# Supplementary material for: Enantioselective organocatalytic oxidation of ketimine
Source: Royal Society of Chemistry journal article supplement (doi:10.1039/c5ob02042e), 2015-11-10
Supplement: c5ob02042e1.pdf [file c5ob02042e1.pdf]

+Supporting Information

## Enantioselective organocatalytic oxidation of ketimine

Shinobu Takizawa,<sup>\*a</sup> Kenta Kishi,<sup>a</sup> Mohamed Ahmed Abozeid,<sup>a</sup> Kenichi Murai,<sup>\*b</sup> Hiromichi Fujioka<sup>b</sup> and Hiroaki Sasai<sup>a</sup>

<sup>a</sup>The Institute of Scientific and Industrial Research (ISIR), Osaka University, Mihogaoka, Ibaraki-shi, Osaka 567-0047, Japan. E-mail: [taki@sanken.osaka-u.ac.jp](mailto:taki@sanken.osaka-u.ac.jp)

<sup>b</sup>Graduate School of Pharmaceutical Sciences, Osaka University, 1-6 Yamada-oka, Suita-shi, Osaka 565-0871. Japan. E-mail: [murai@phs.osaka-u.ac.jp](mailto:murai@phs.osaka-u.ac.jp)

### Contents:

A. NMR charts (p2-p14)

B. HPLC charts (p15-p24)

# A. NMR charts

E:\nmr\3975H proton-1-1.als

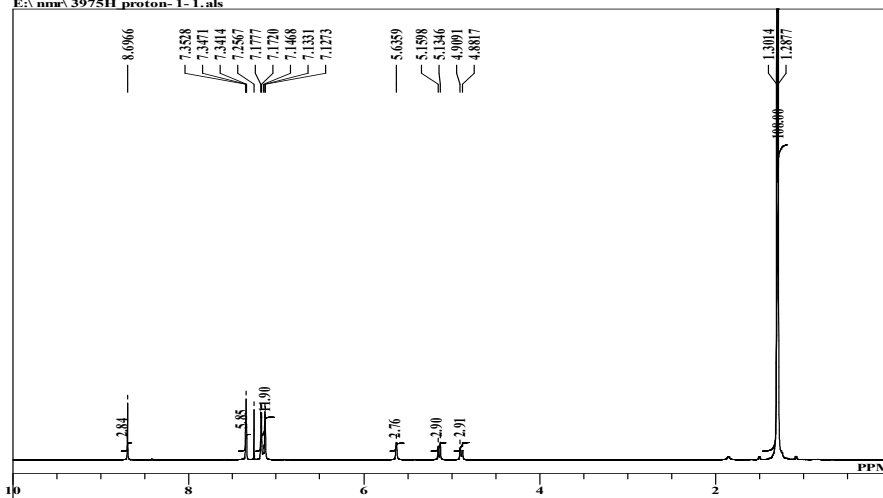

DFILE 3975H proton-1-1.als  
 COMNT single pulse  
 DATIM 21-01-2015 16:59:20  
 OBNUC 1H  
 EXMOD proton.jp  
 OBFREQ 300.53 MHz  
 OBSET 1.15 kHz  
 OBTIN 8.57 Hz  
 POINT 13107  
 FREQU 4508.57 Hz  
 SCANS 64  
 ACQTM 2.9072 sec  
 PD 2.0000 sec  
 PWI 5.60 usec  
 IRNUC 1H  
 CTEMP 17.8 c  
 SLVNT CDCL3  
 EXREF 0.00 ppm  
 BF 0.12 Hz  
 RGAIN 36

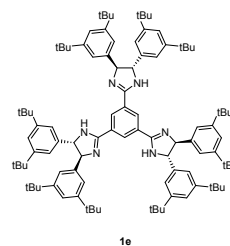

E:\nmr\3975C-2 Carbon-1-1.als

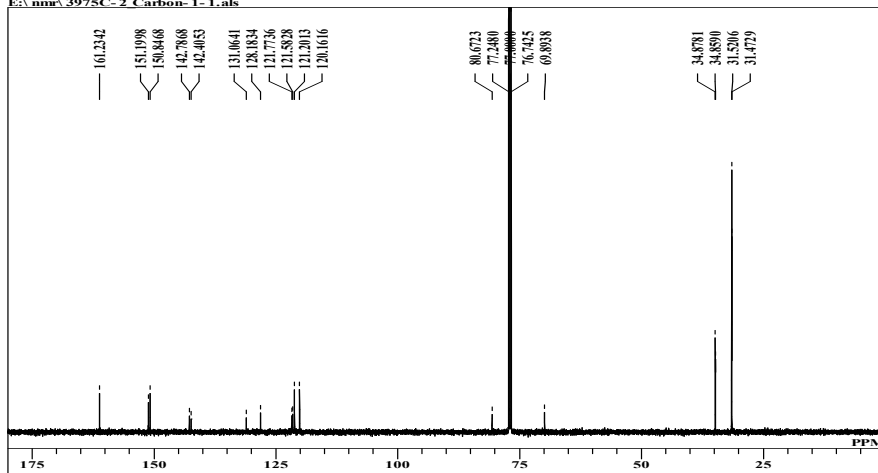

DFILE 3975C-2 Carbon-1-1.als  
 COMNT single pulse decoupled gate  
 DATIM 22-01-2015 15:12:45  
 OBNUC 13C  
 EXMOD carbon.jp  
 OBFREQ 125.77 MHz  
 OBSET 7.87 kHz  
 OBTIN 4.21 Hz  
 POINT 26214  
 FREQU 31446.54 Hz  
 SCANS 909  
 ACQTM 0.8336 sec  
 PD 2.5000 sec  
 PWI 3.20 usec  
 IRNUC 1H  
 CTEMP 18.3 c  
 SLVNT CDCL3  
 EXREF 77.00 ppm  
 BF 0.12 Hz  
 RGAIN 60

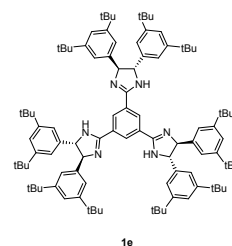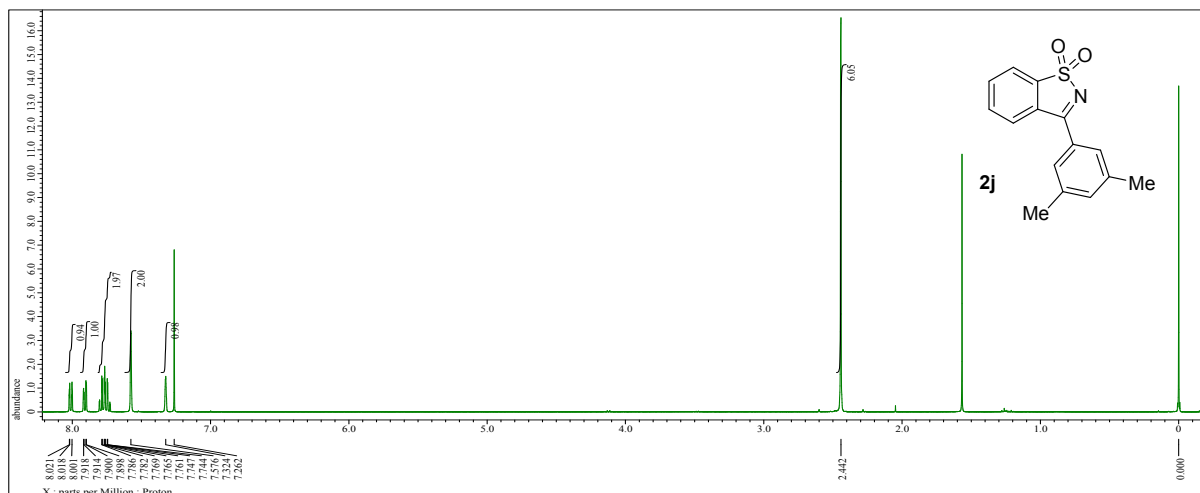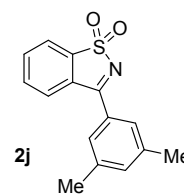

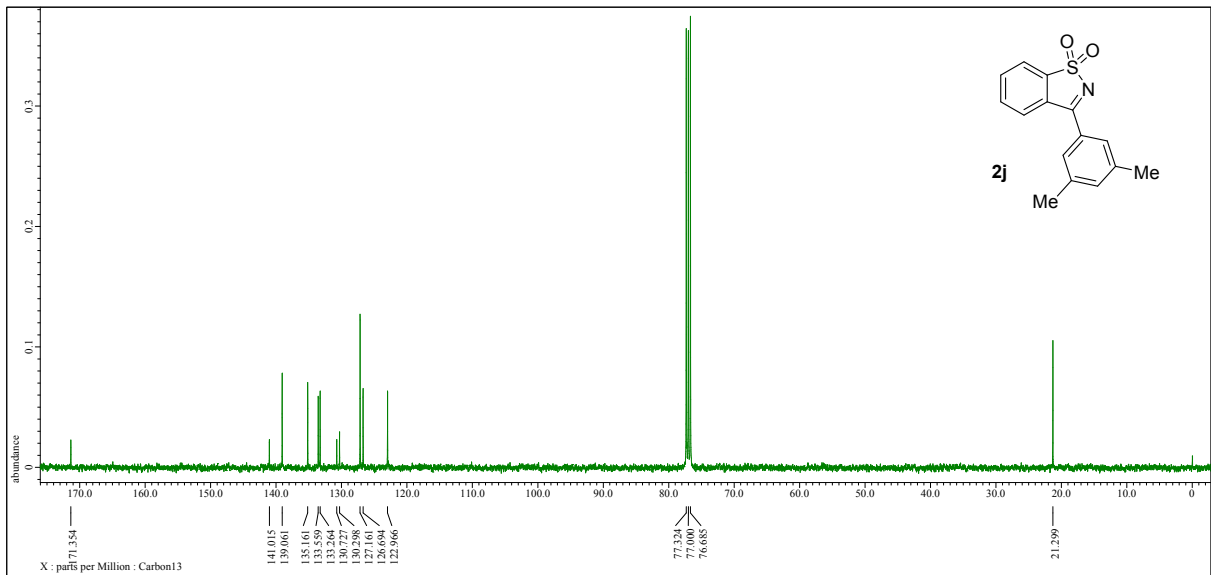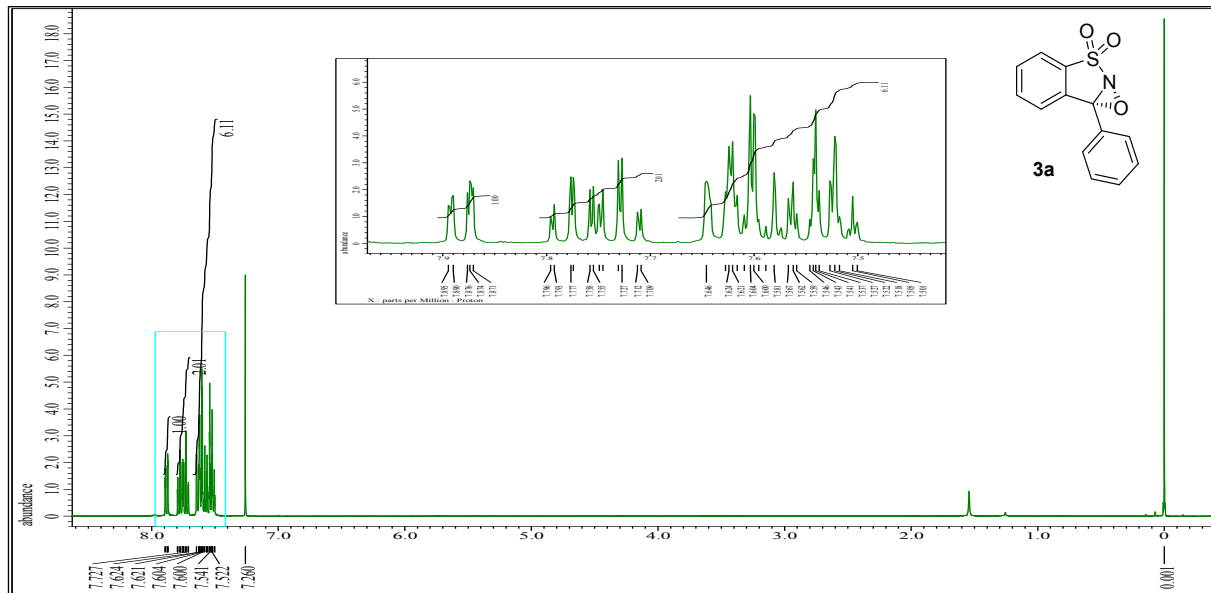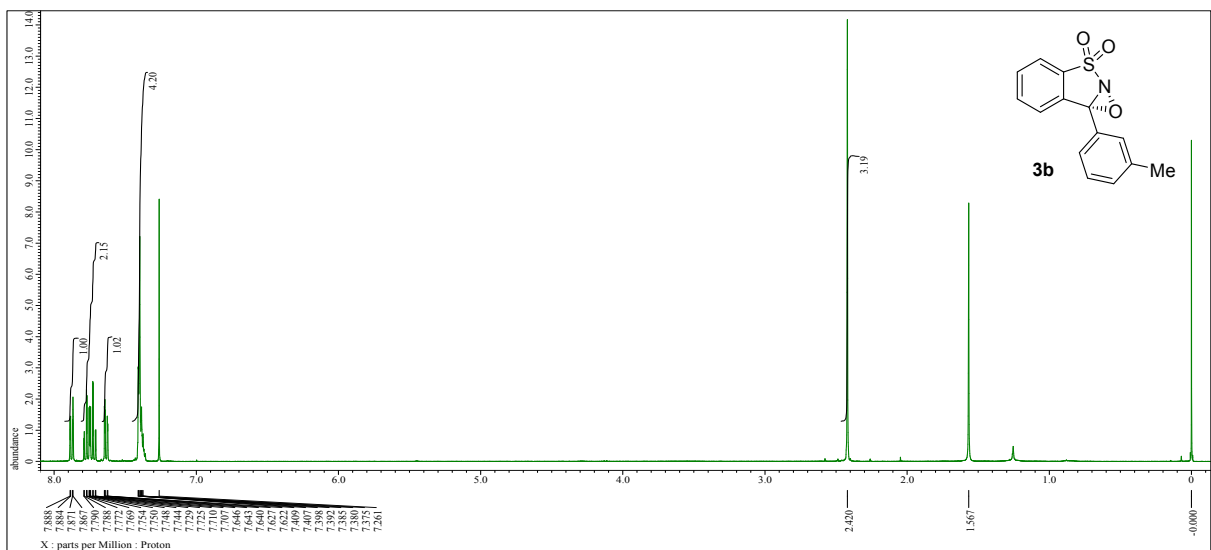

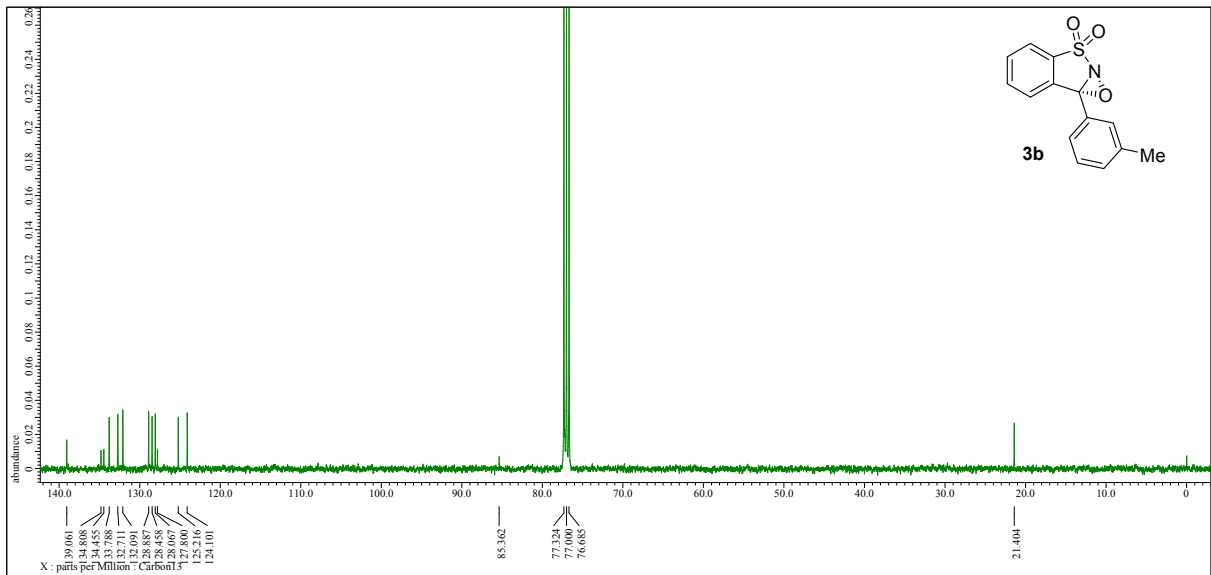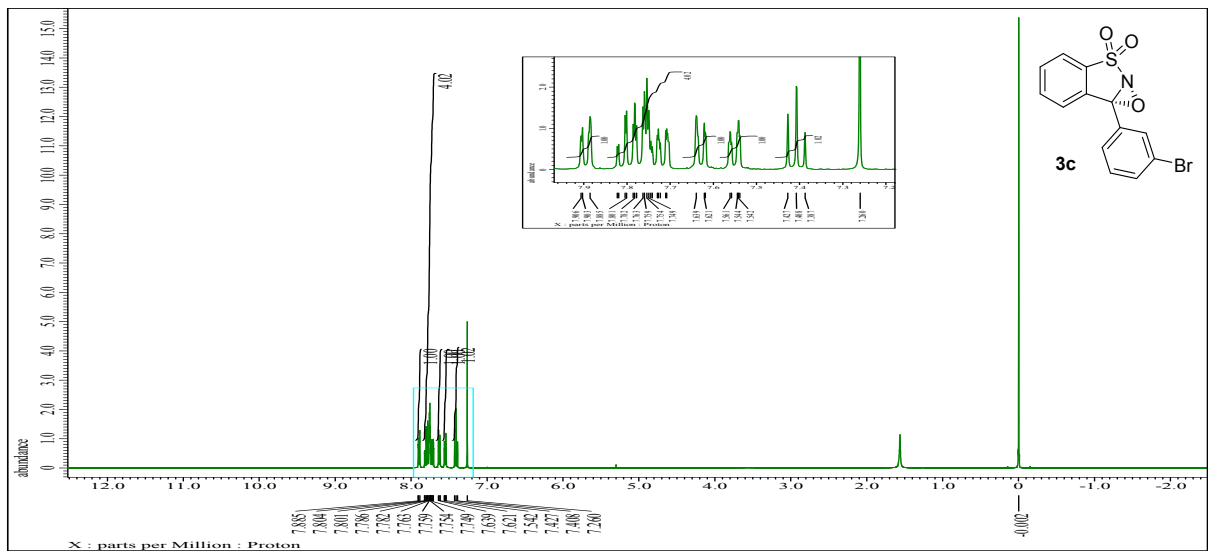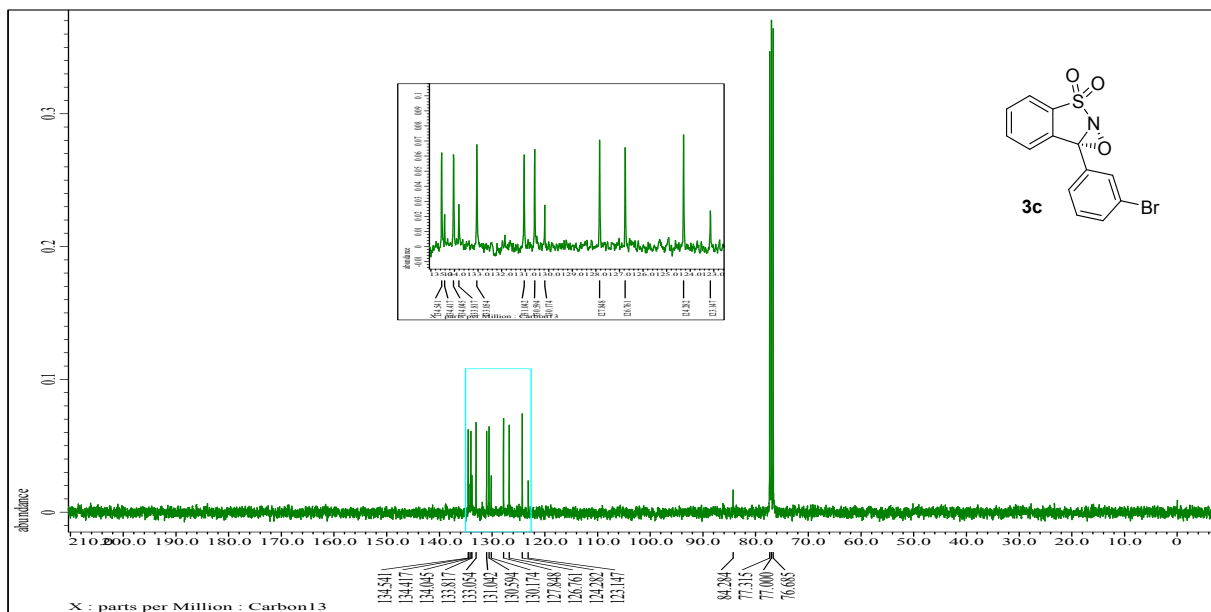

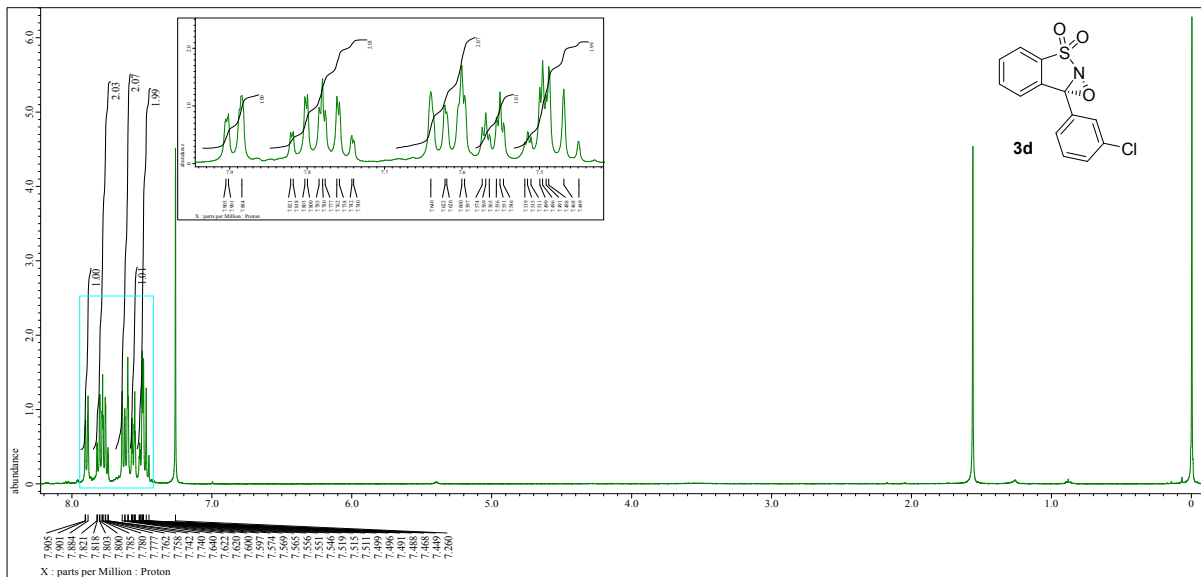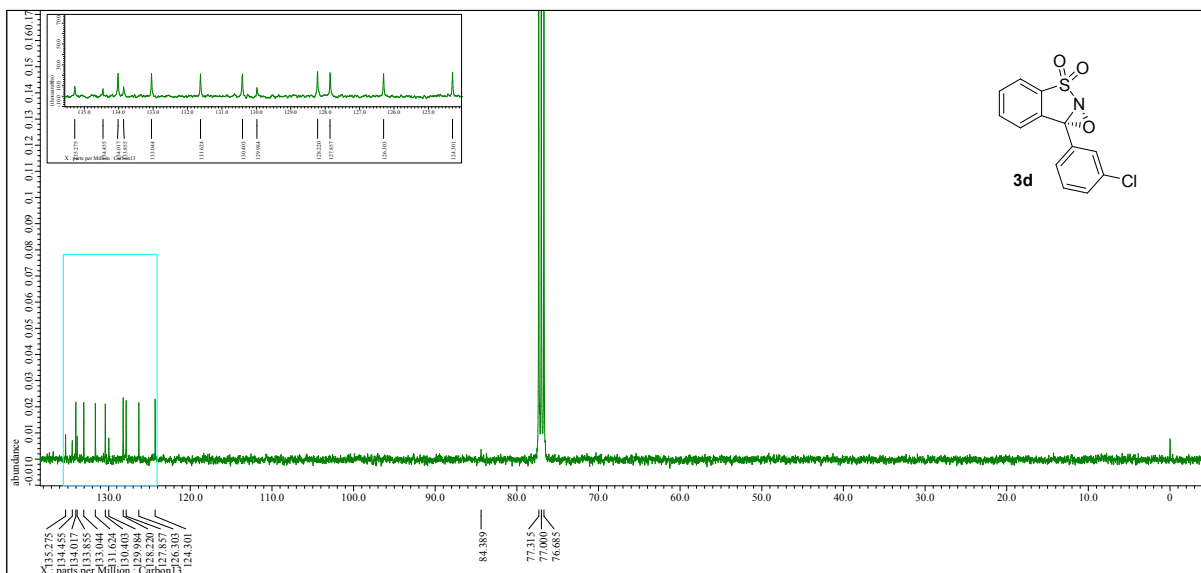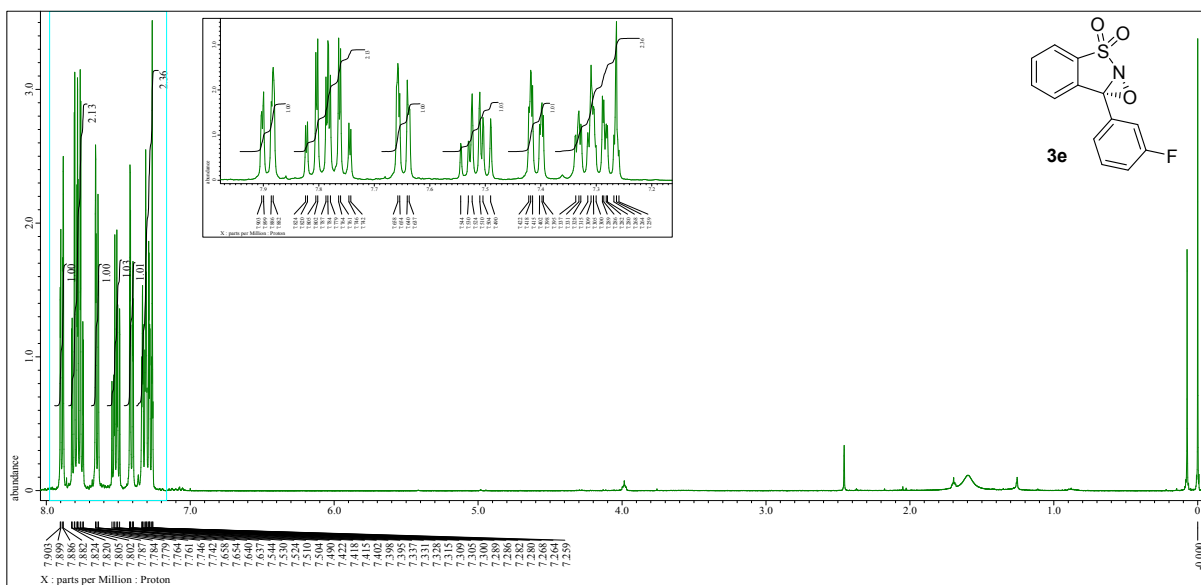

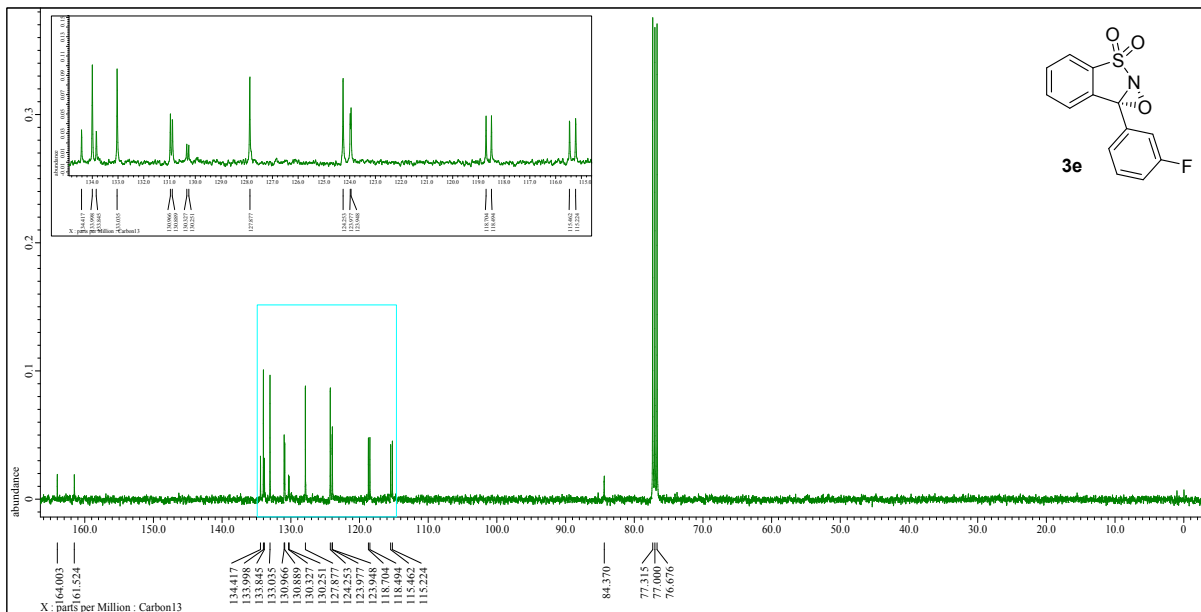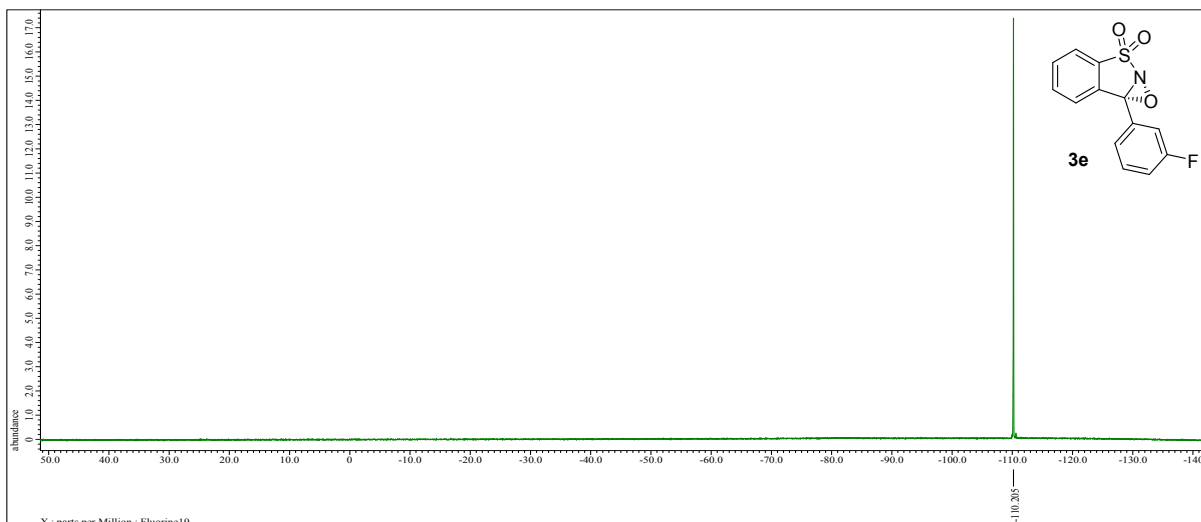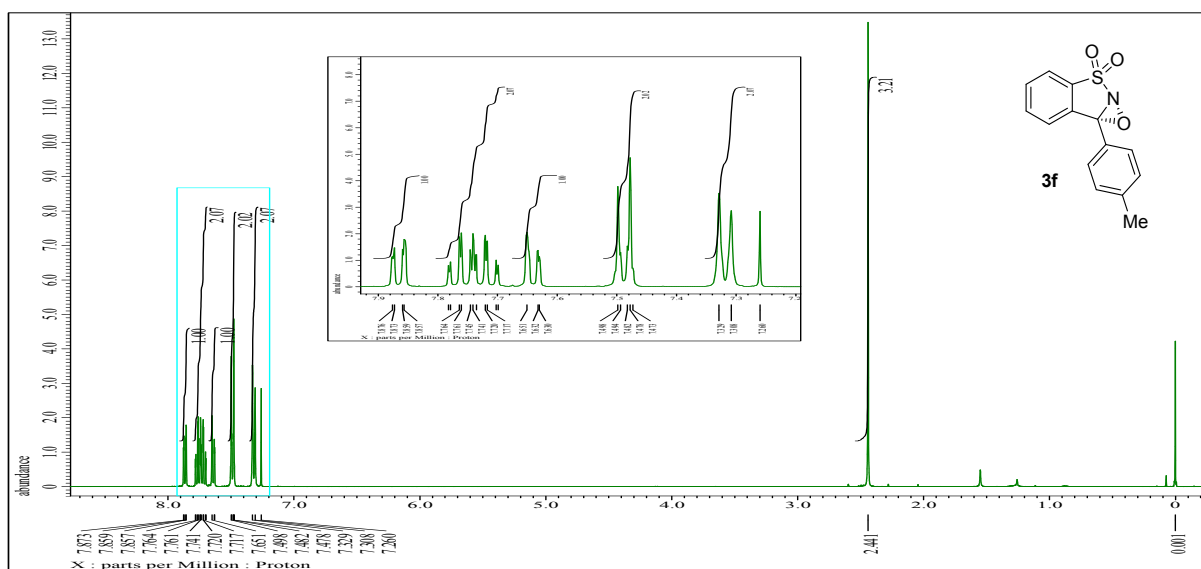

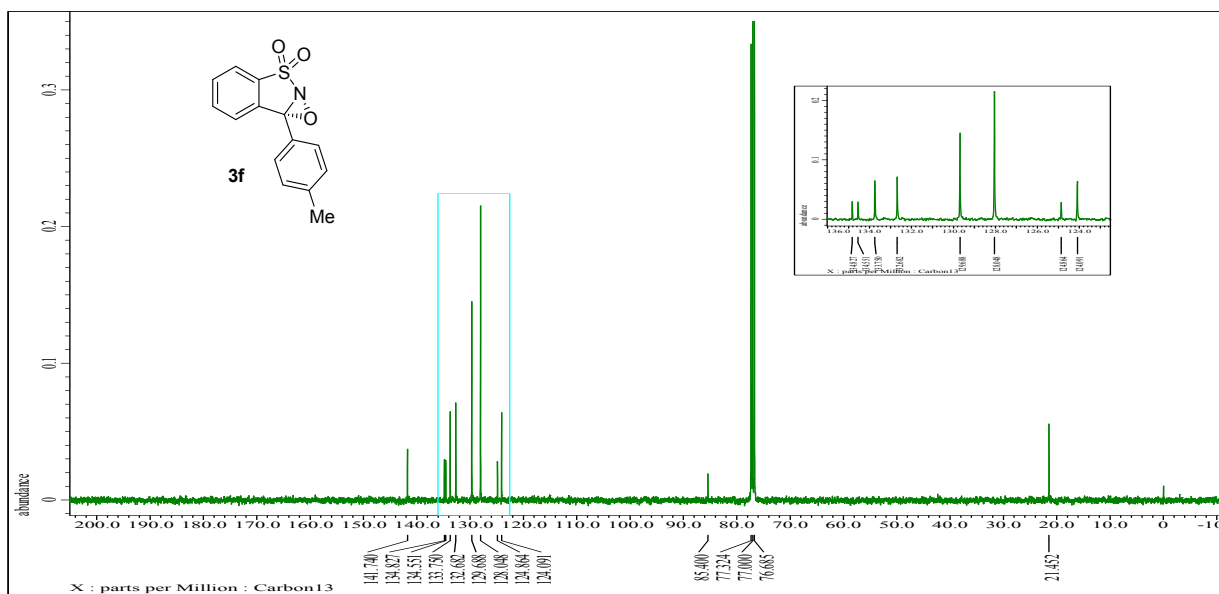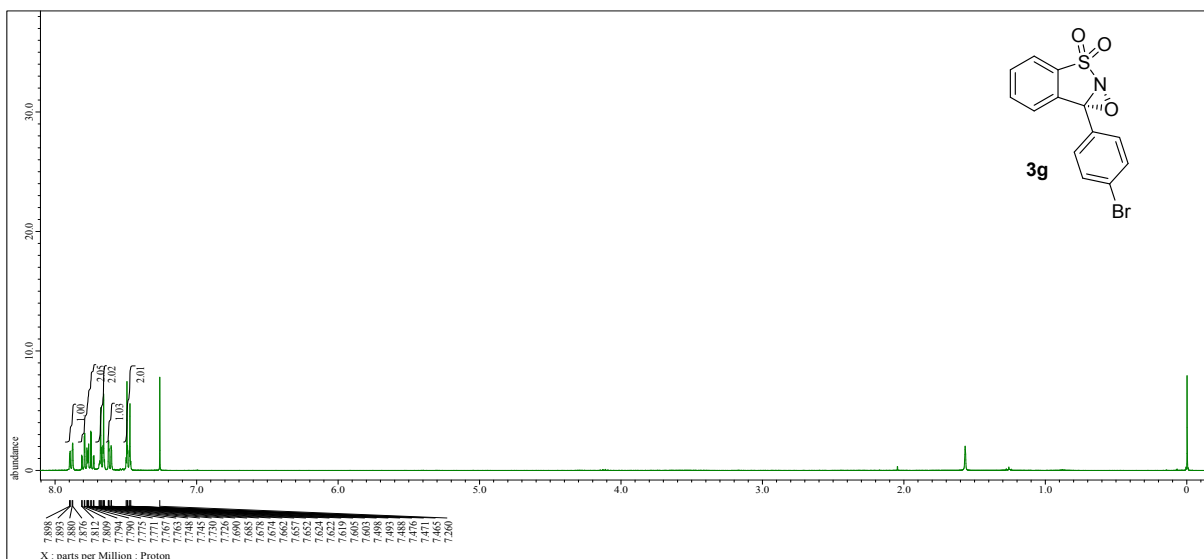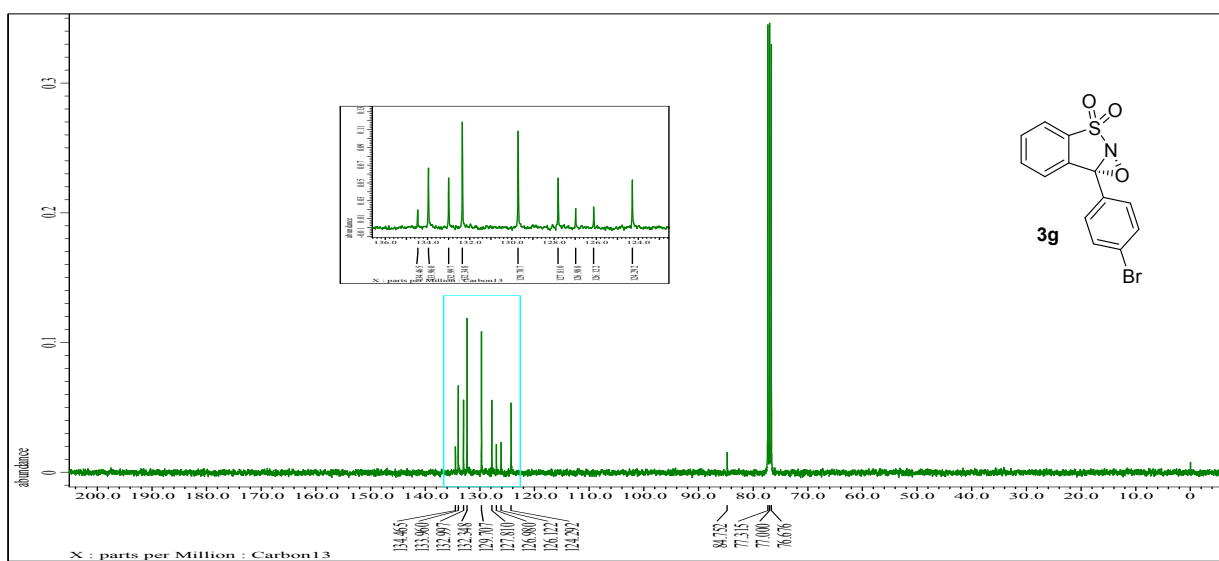

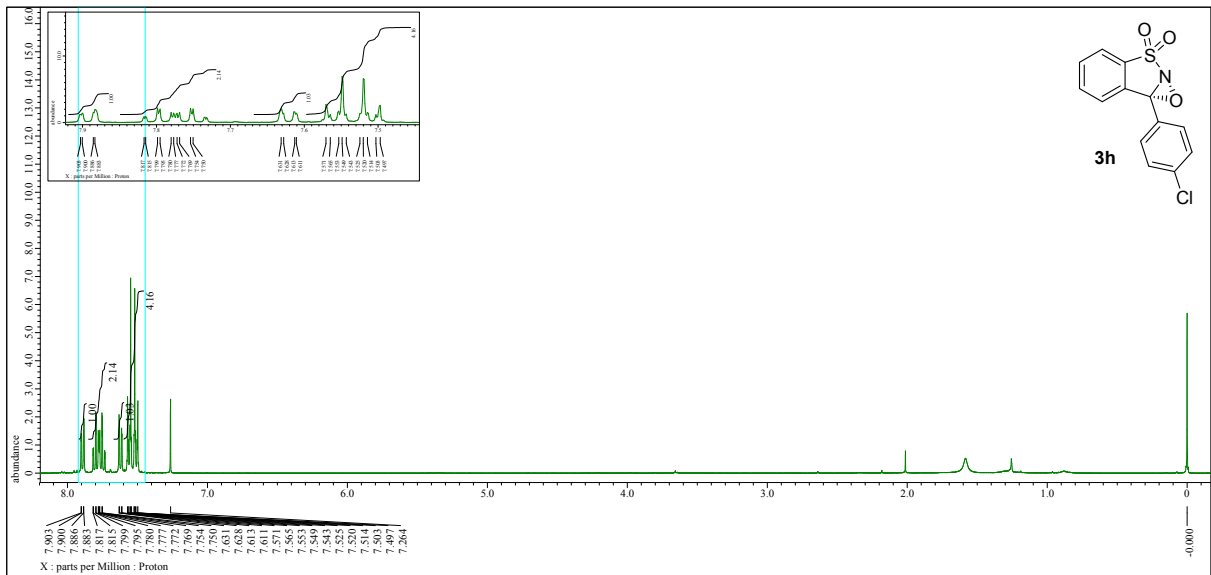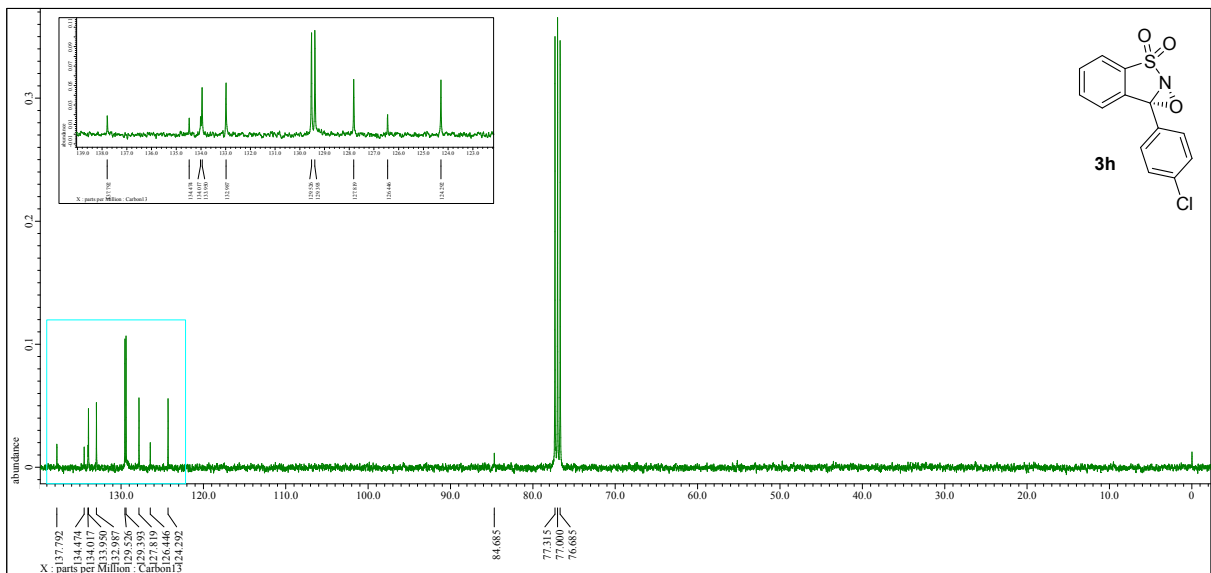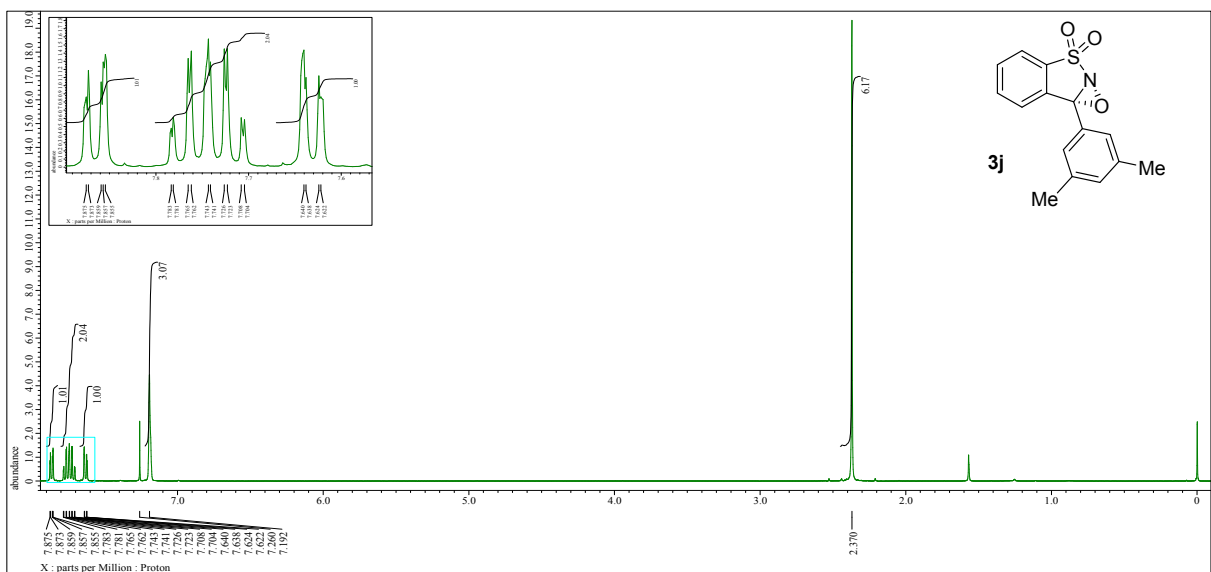



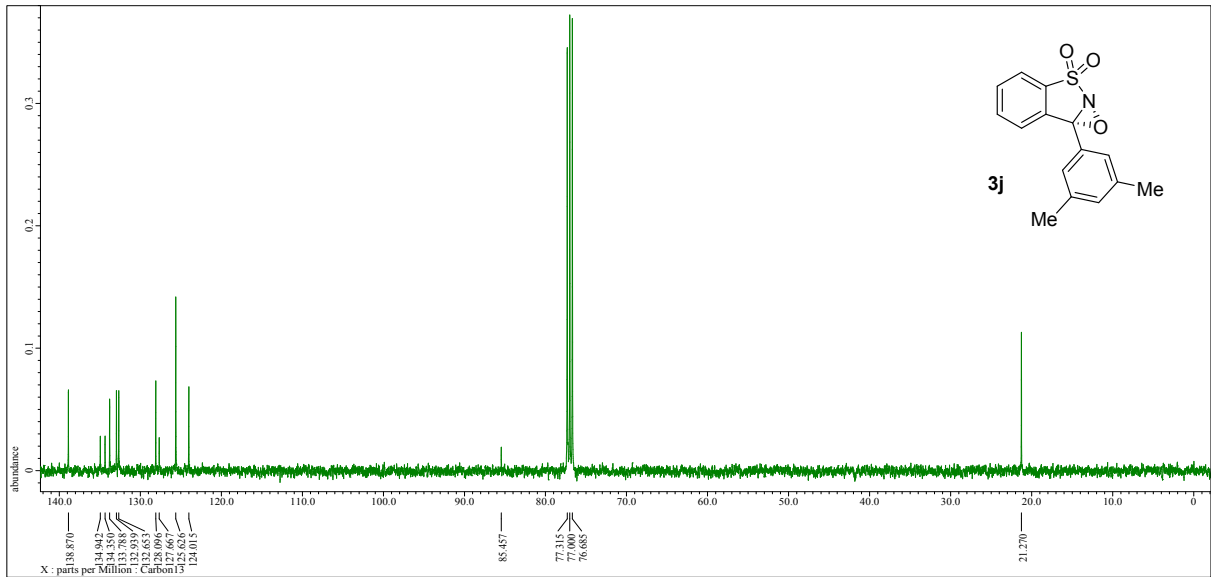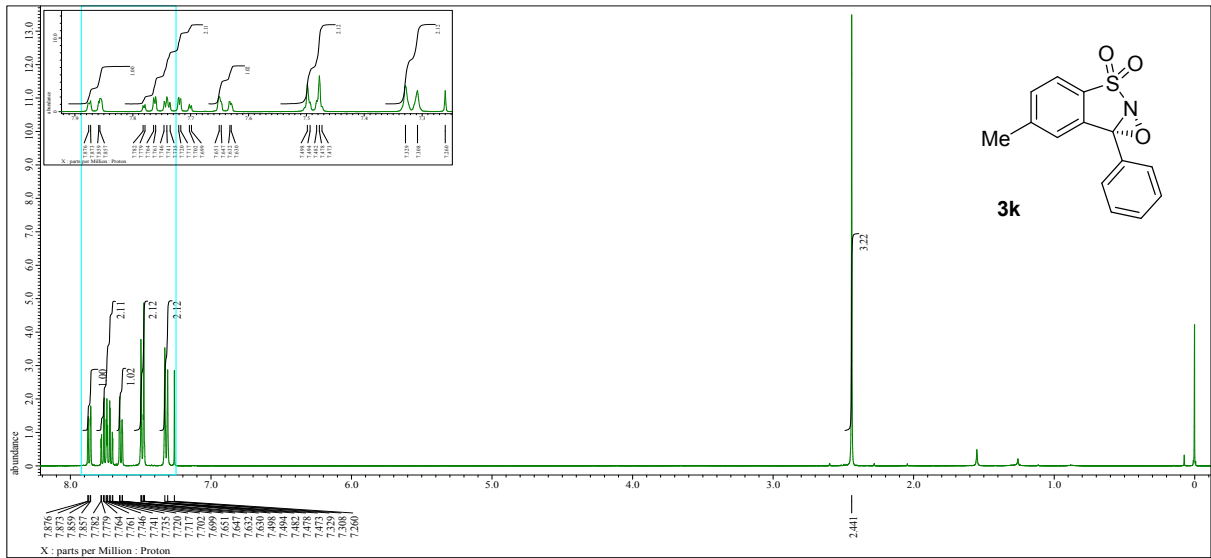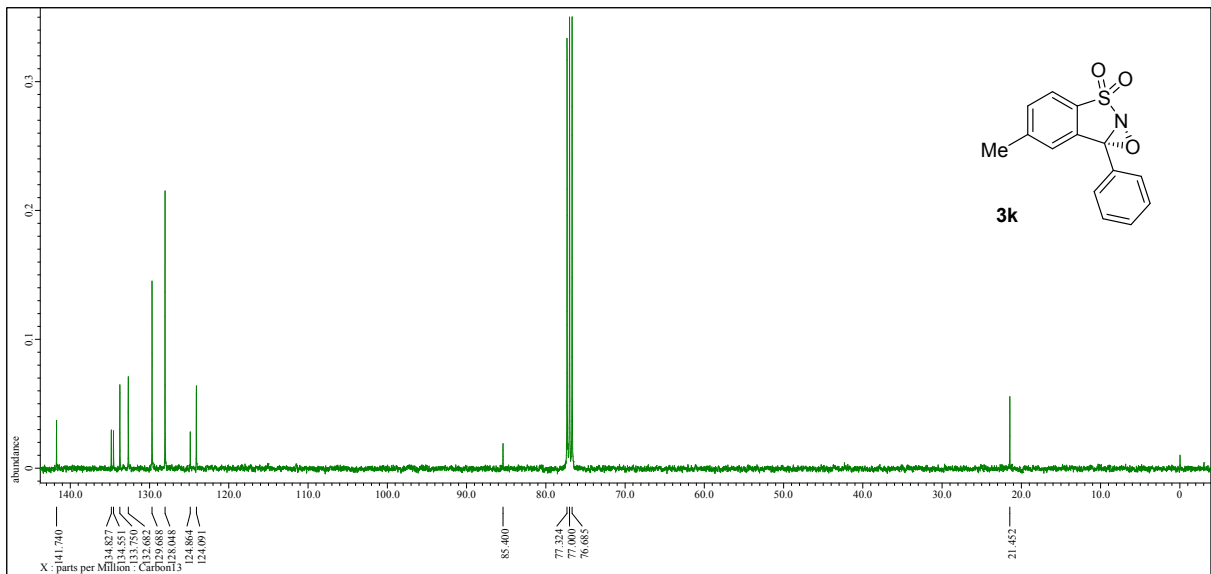

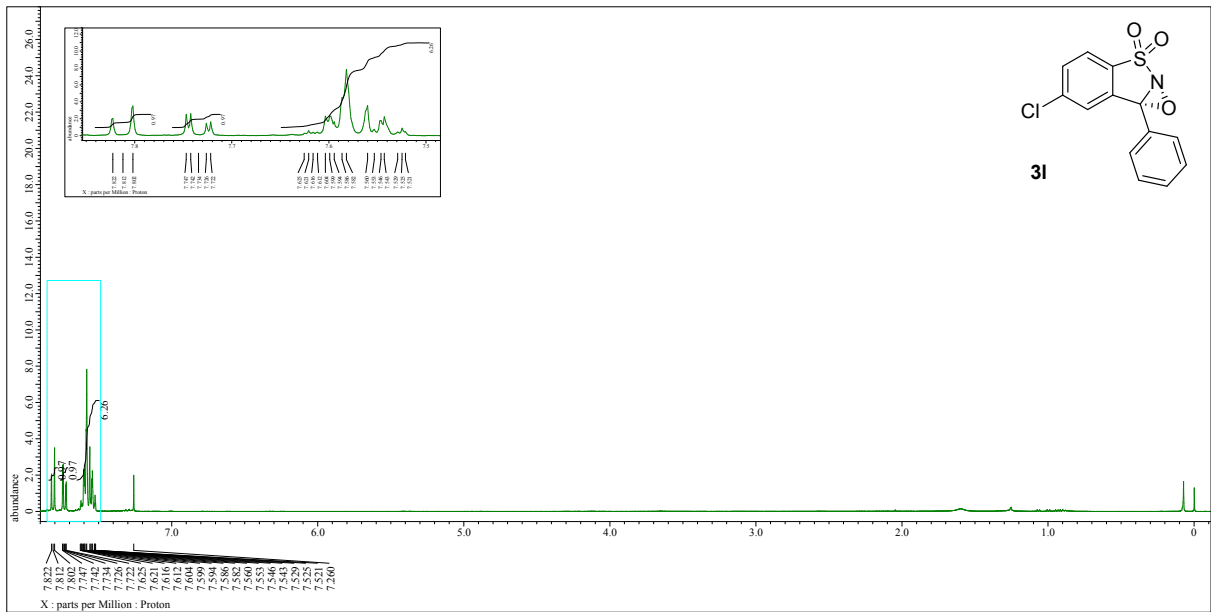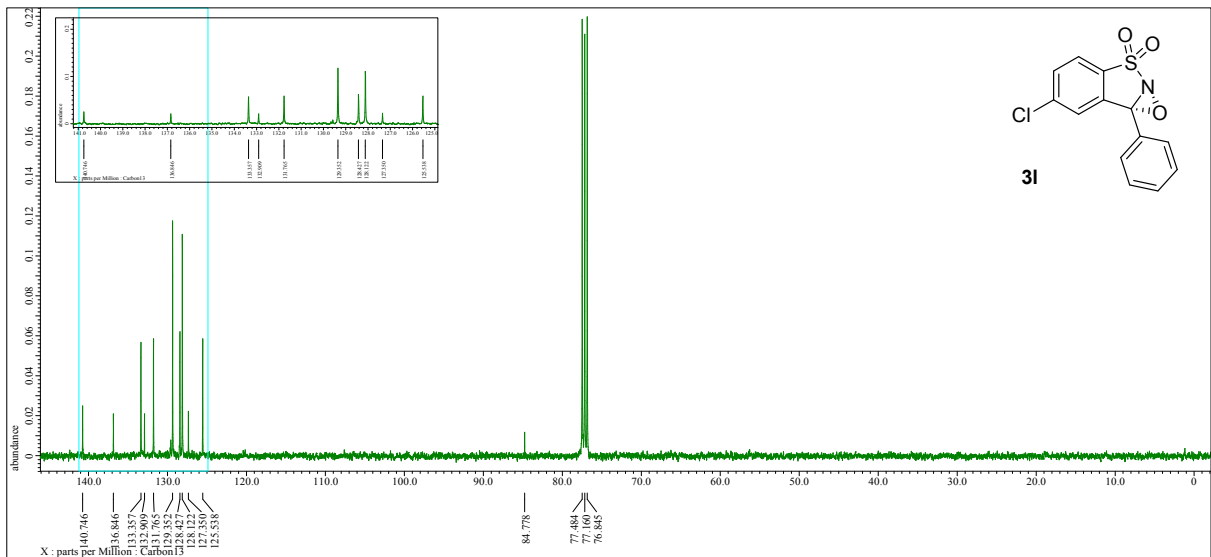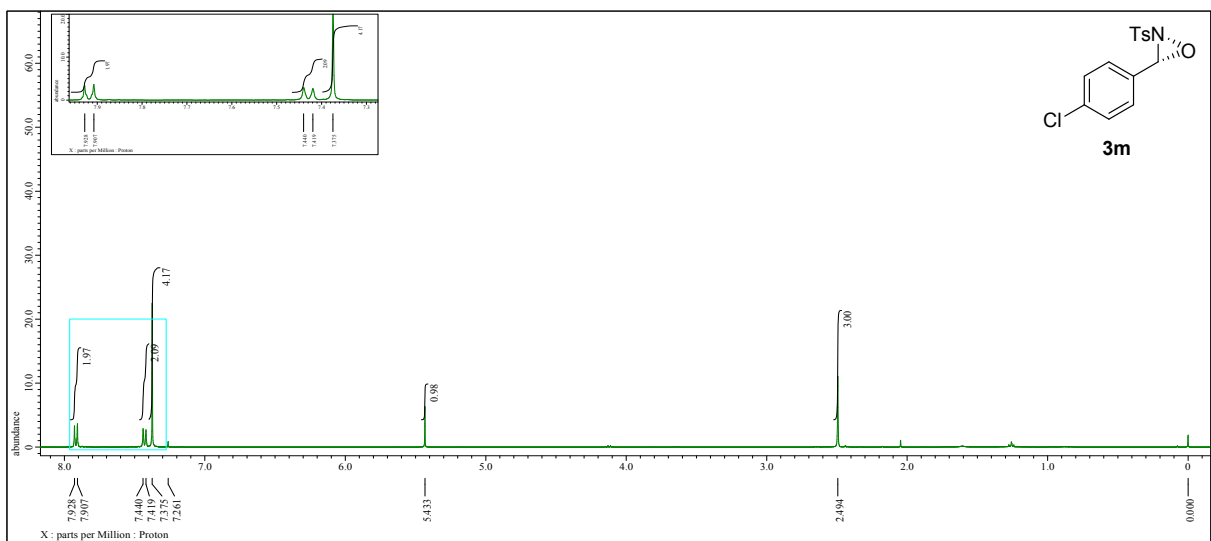

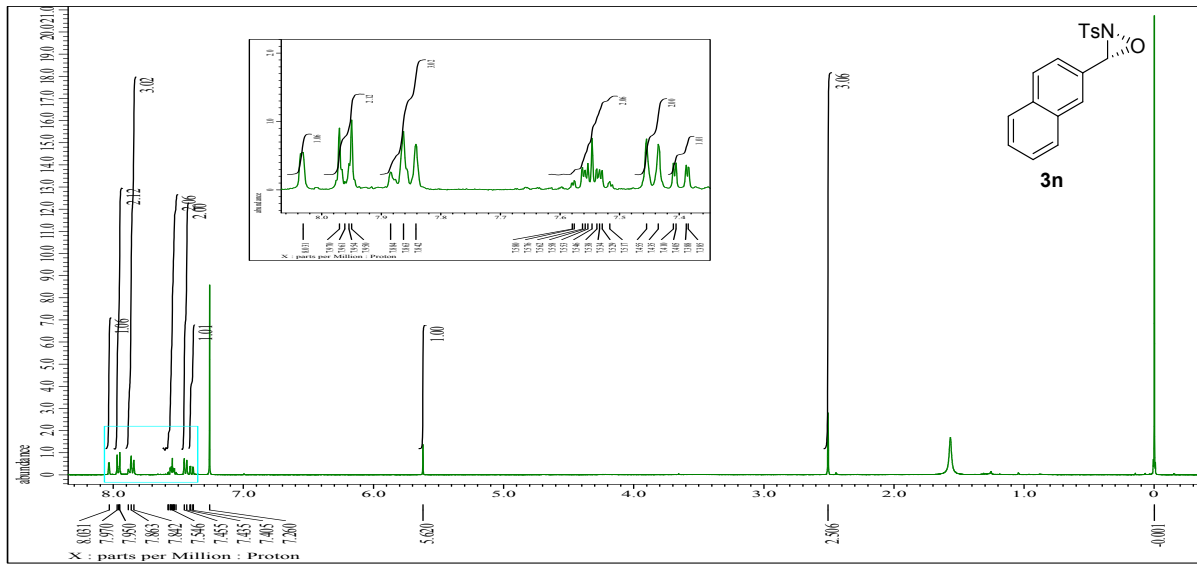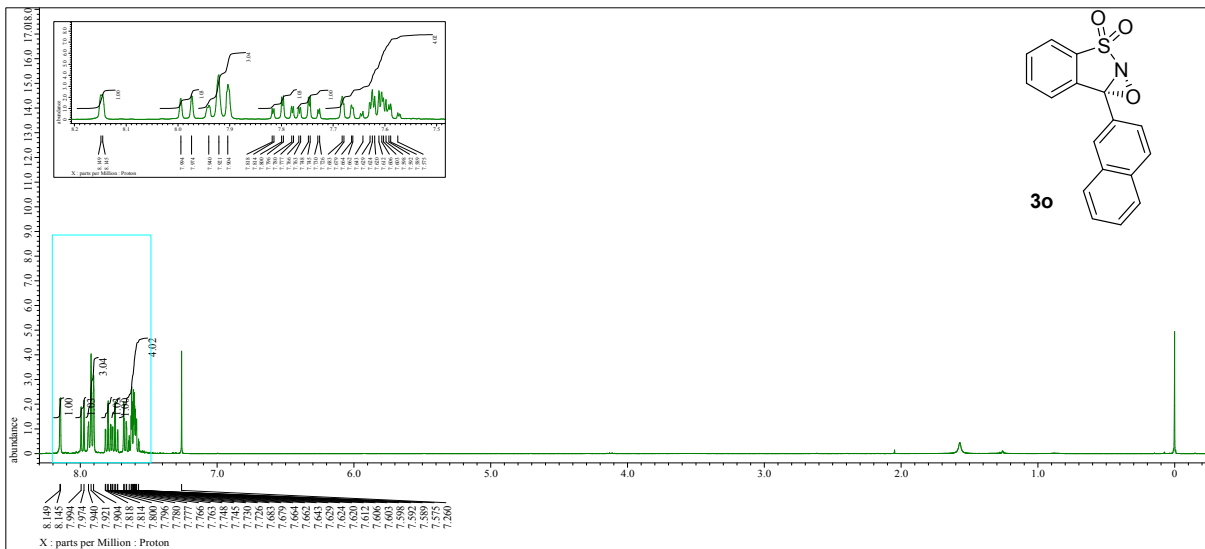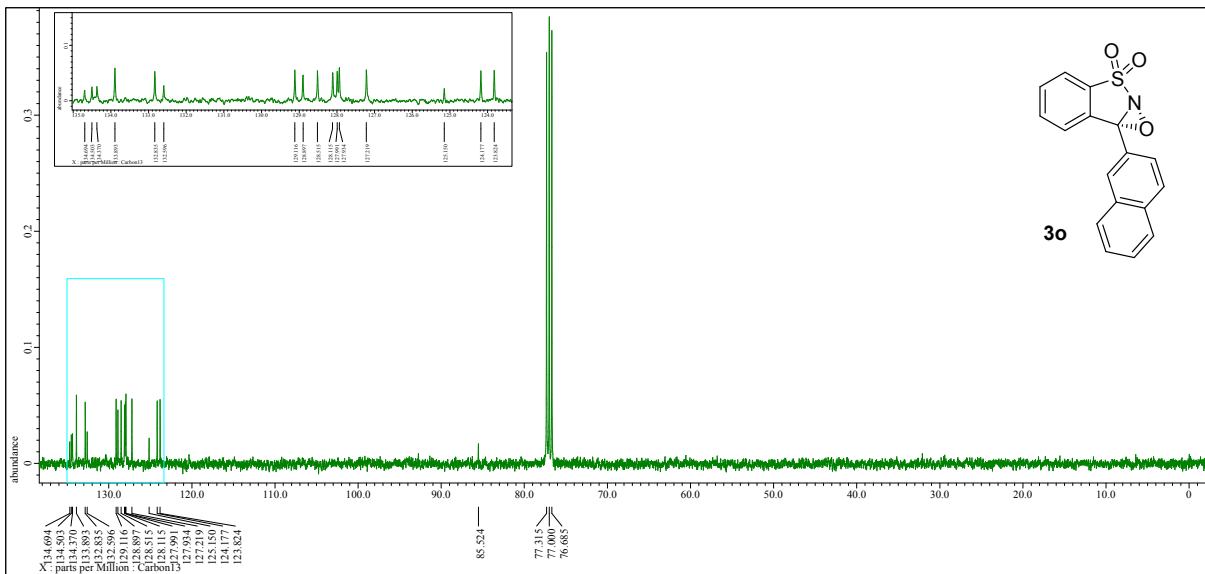

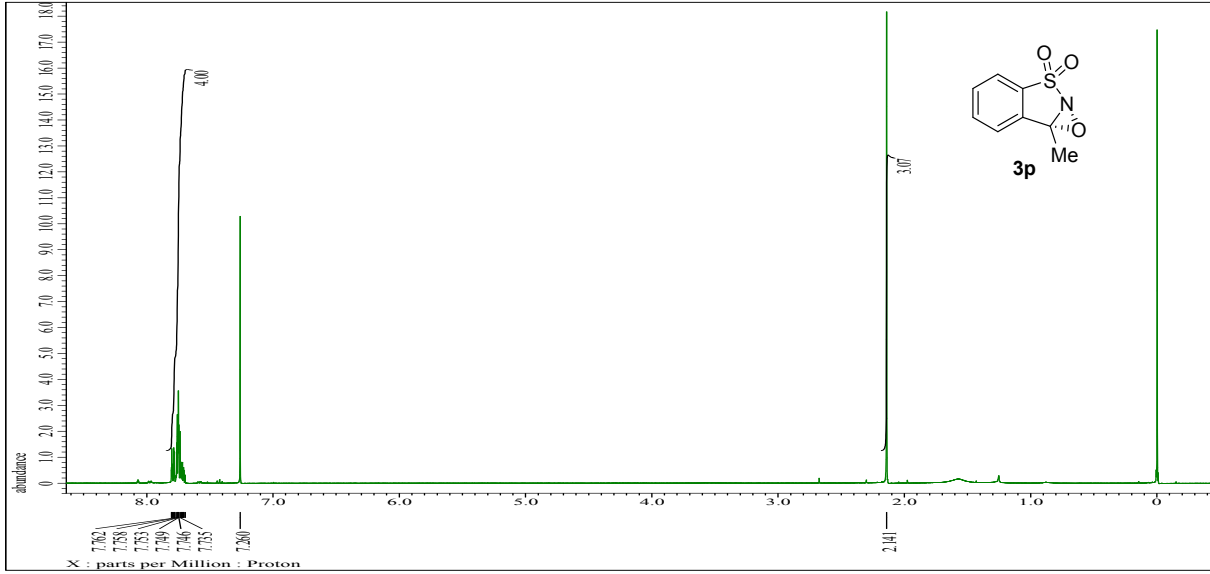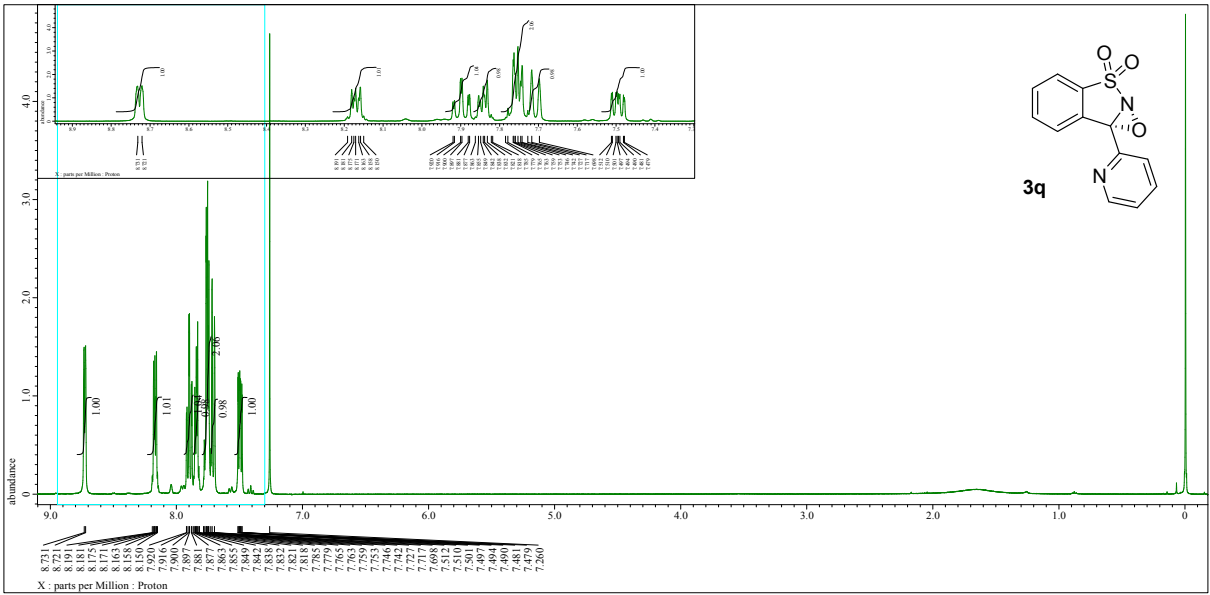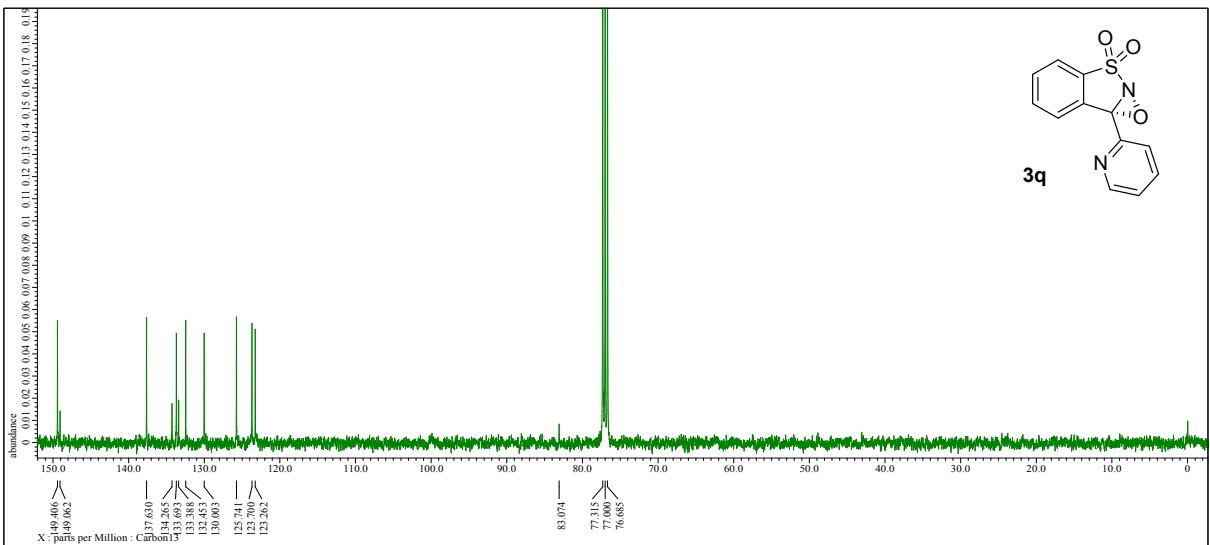

$^1\text{H-NMR}$  spectra in  $d^8$ -toluene : a) catalyst **1a**, b) *m*CPBA, c) catalyst **1a** + *m*CPBA, d) catalyst **1a** + *m*CPBA +  $\text{D}_2\text{O}$ , e) ketimine **2j**, and f) catalyst **1a** + ketimine **2j**.

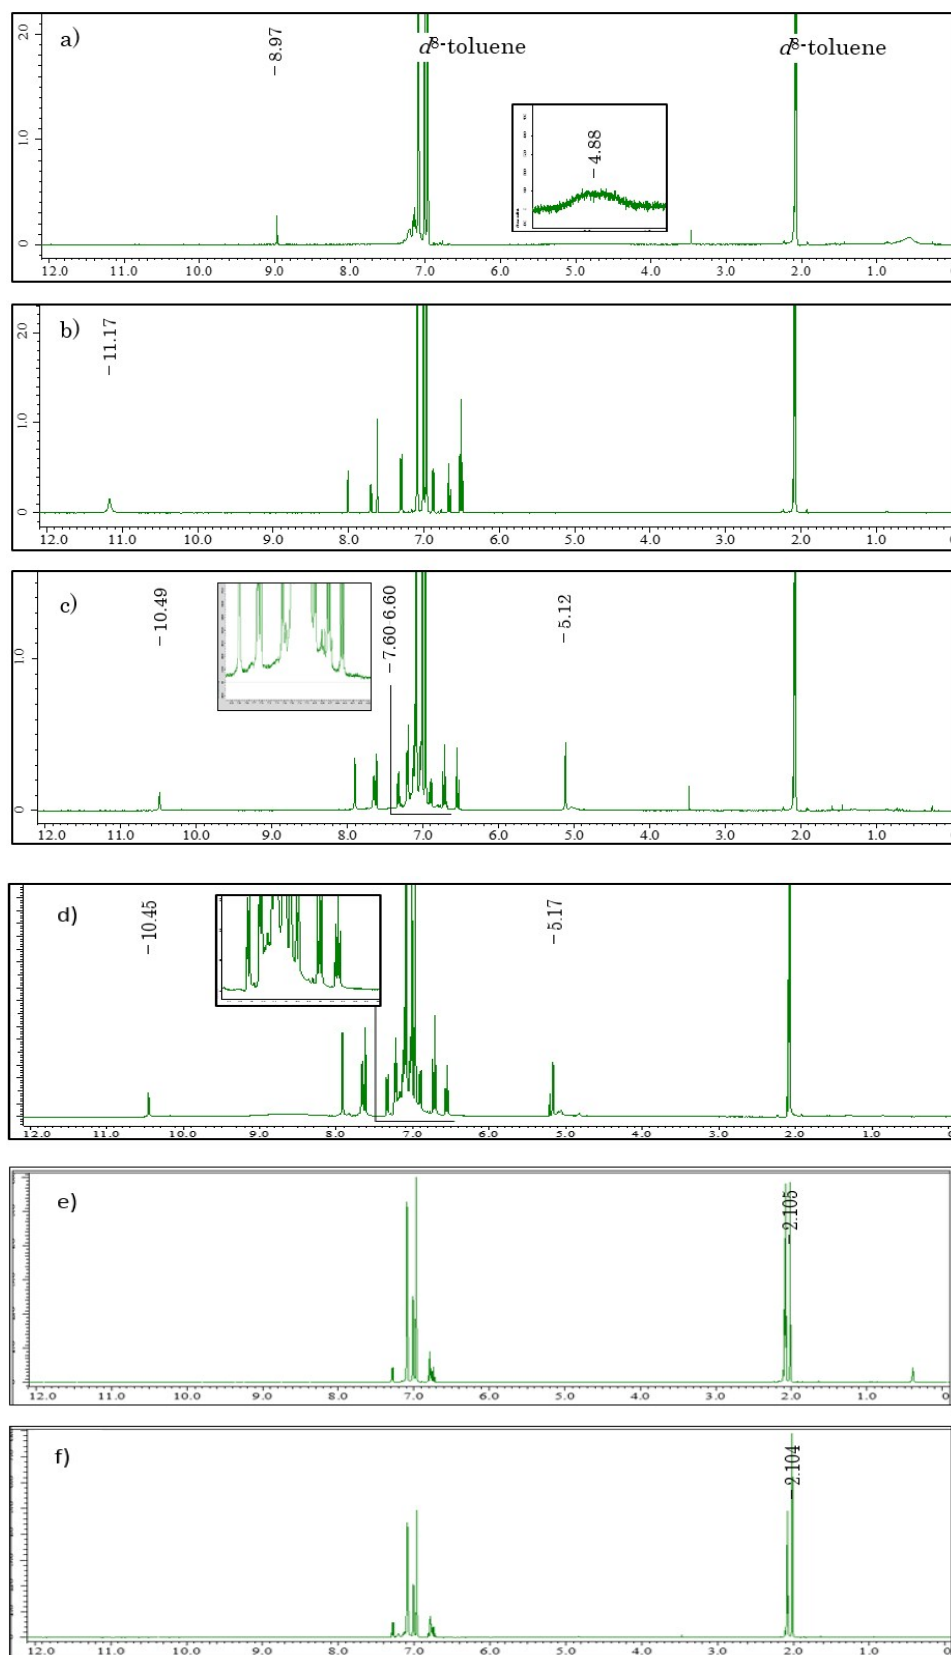

2D-NOESY NMR spectrum of catalyst 1a and *m*CPBA in  $d^8$ -toluene.

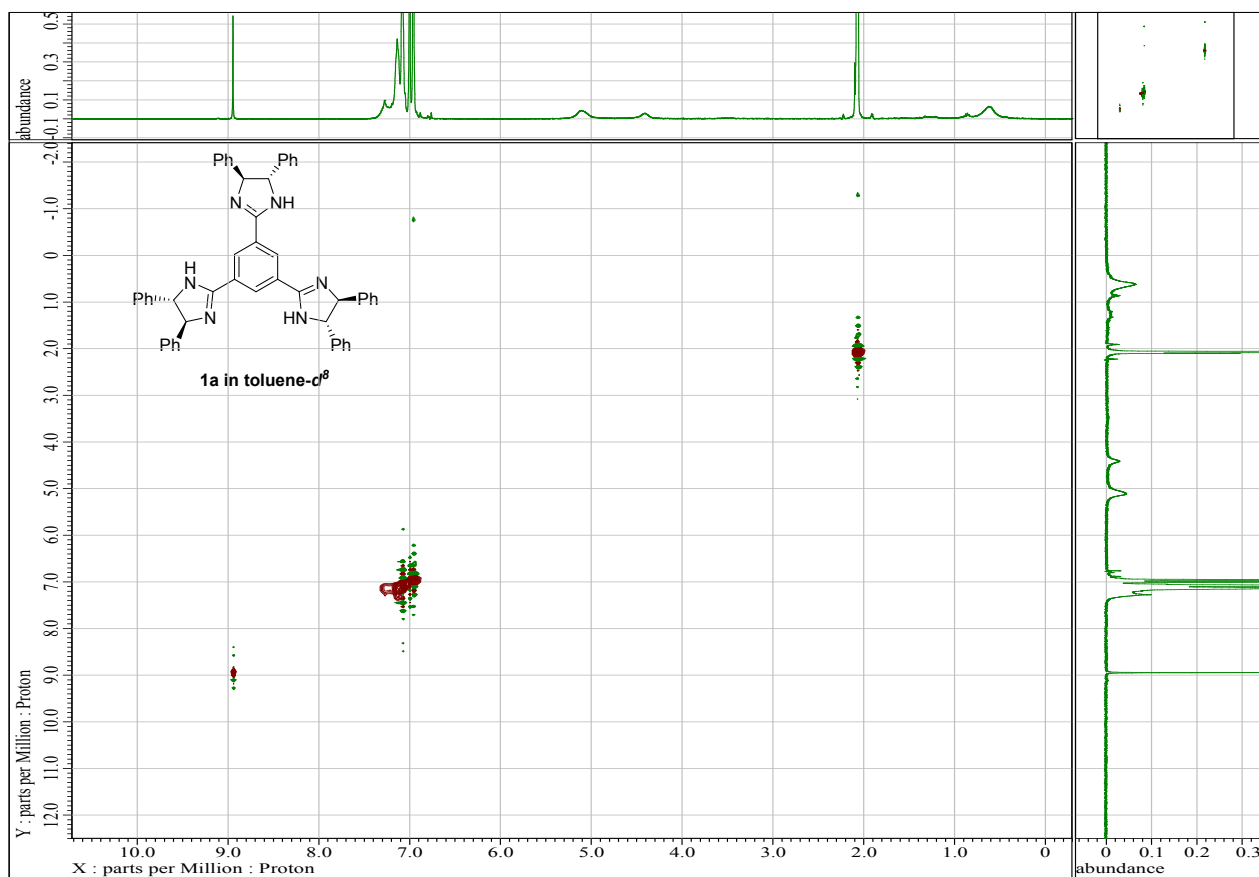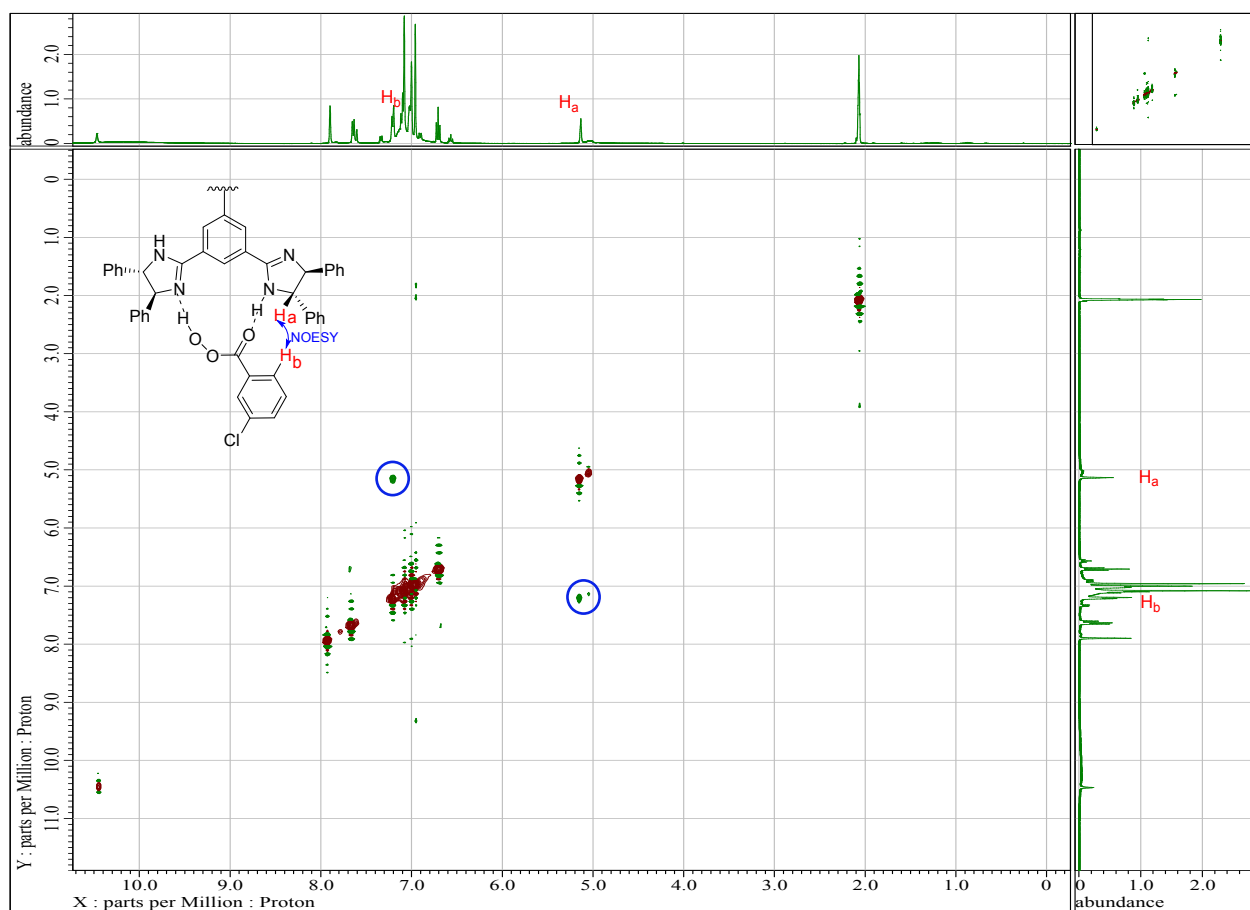

## B. HPLC charts

IA

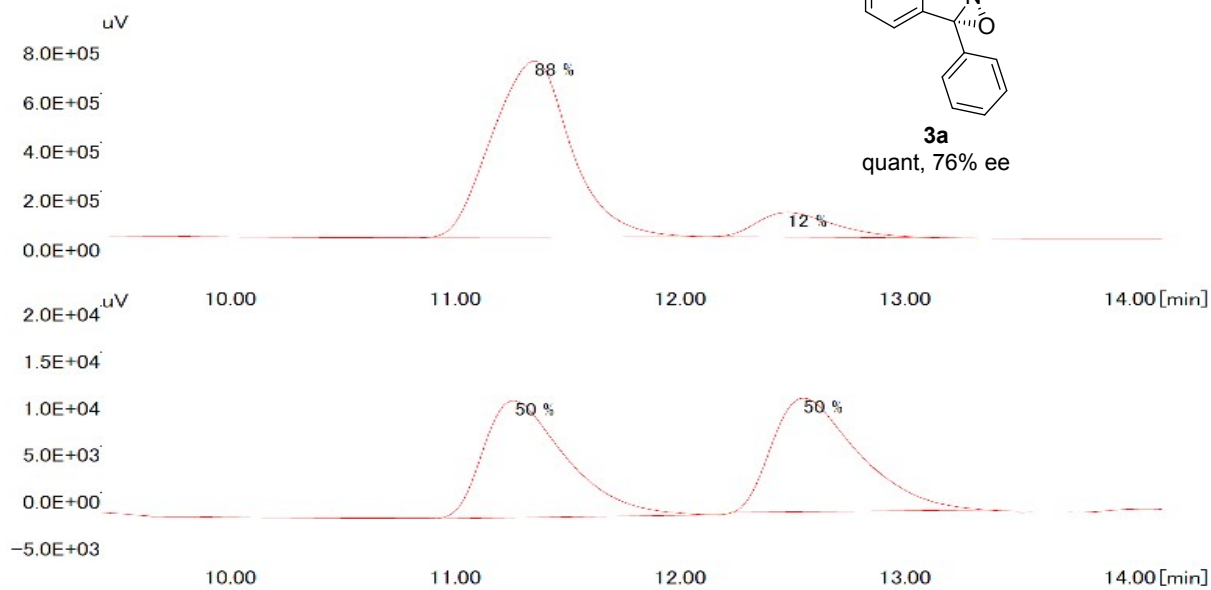

| # | ピーク名 | Rt     | ピーク名 | 面積%   | 定量値   |
|---|------|--------|------|-------|-------|
| 1 |      | 11.383 |      | 87.88 | 0.000 |
| 2 |      | 12.508 |      | 12.12 | 0.000 |

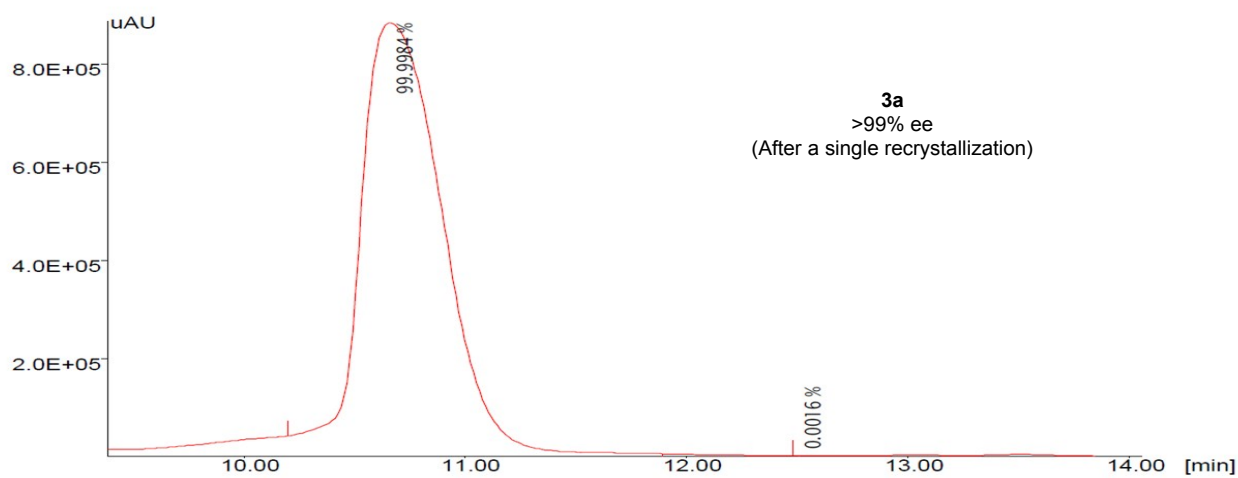

IA

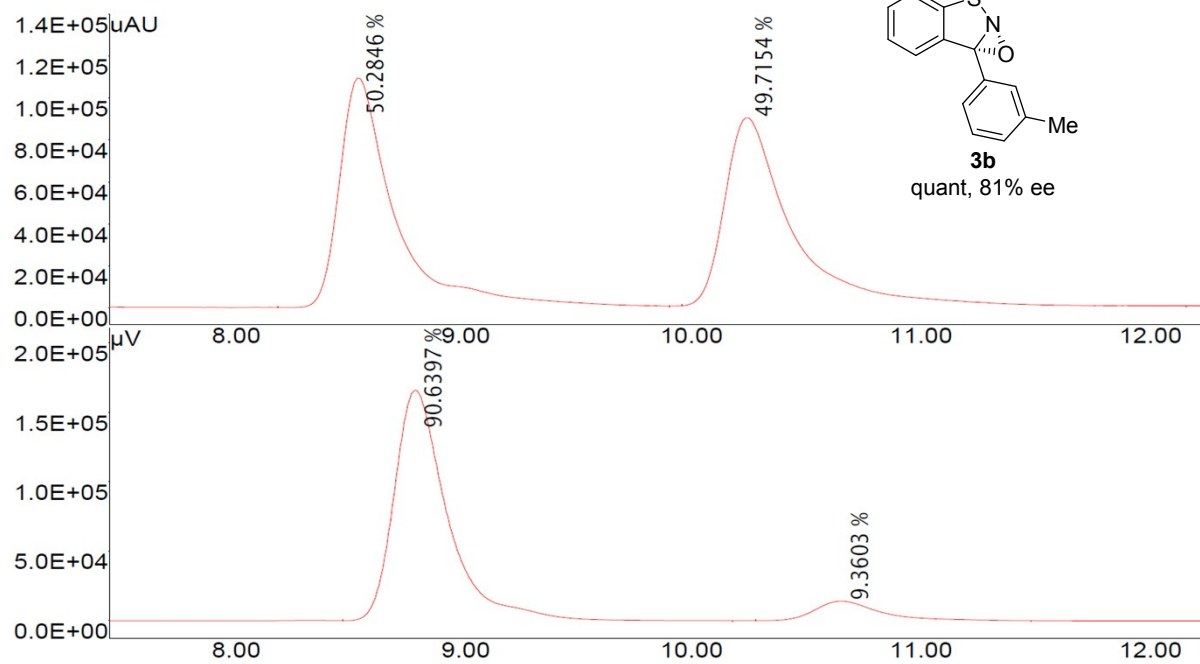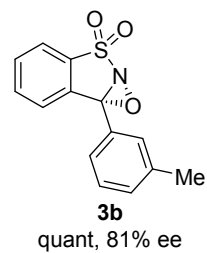

| # | Name | RT     | Area [uV. Sec] | %Area |
|---|------|--------|----------------|-------|
| 1 |      | 8.833  | 2678782.000    | 90.64 |
| 2 |      | 10.692 | 276637.500     | 9.36  |



ID

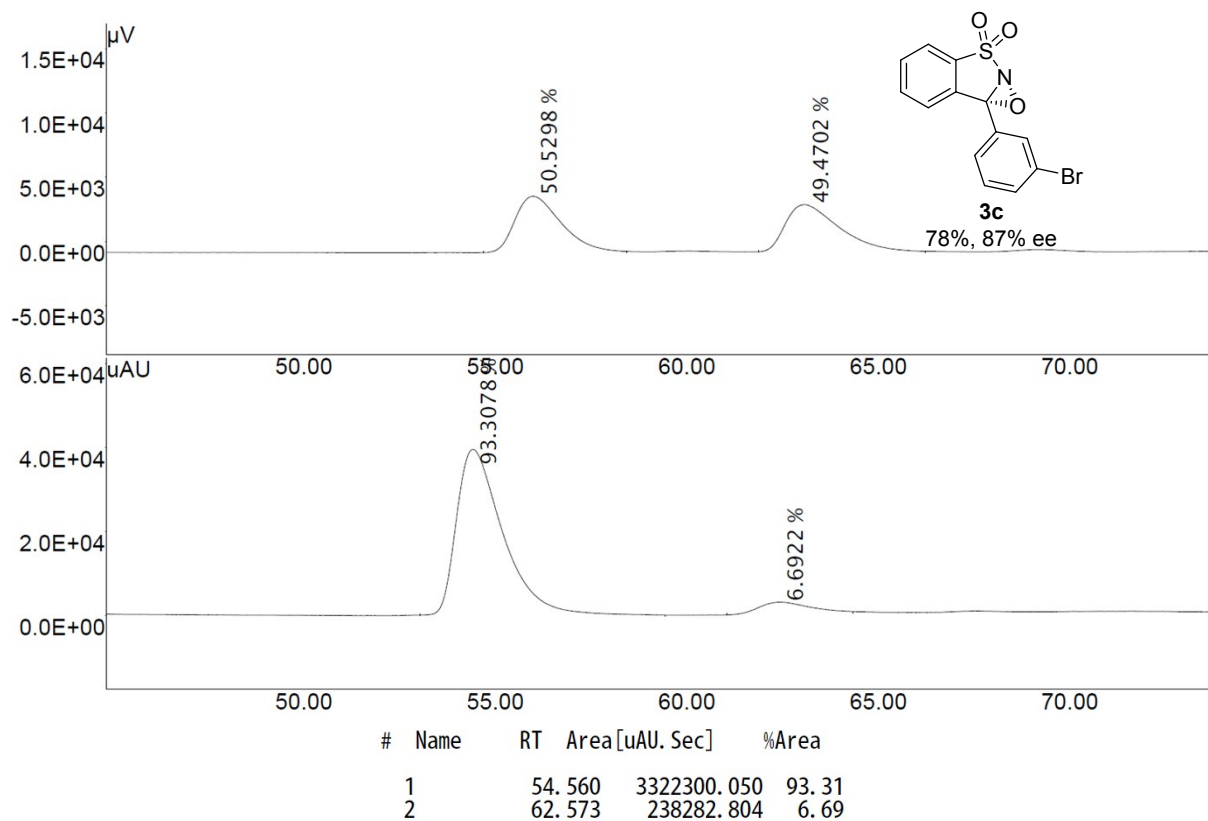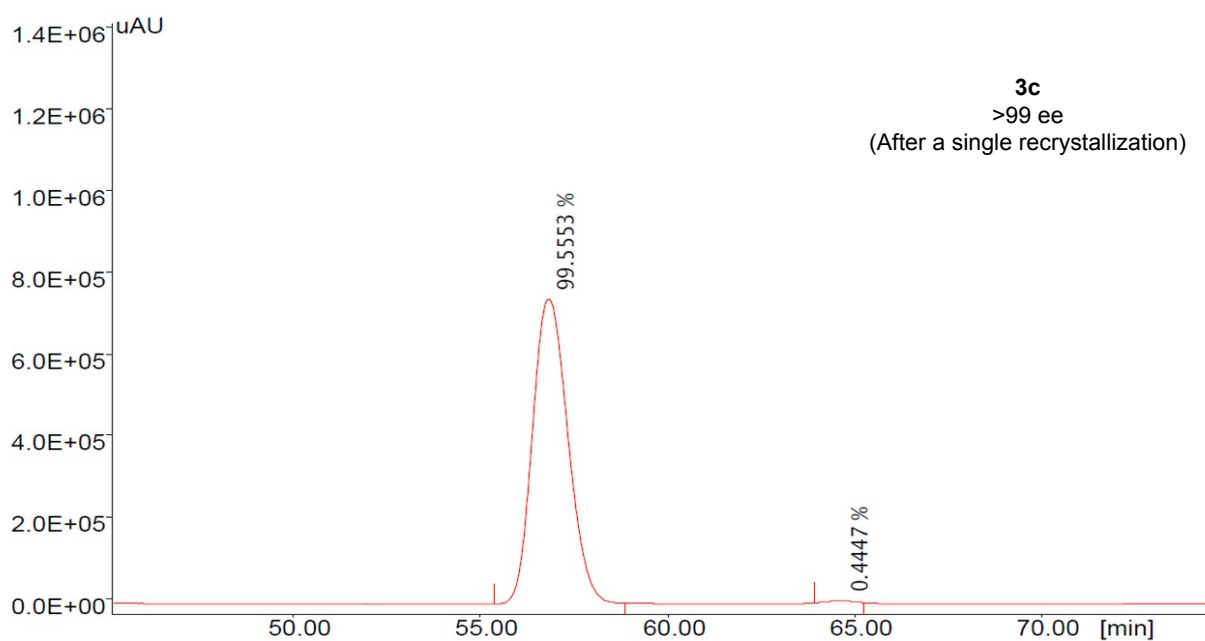

ID

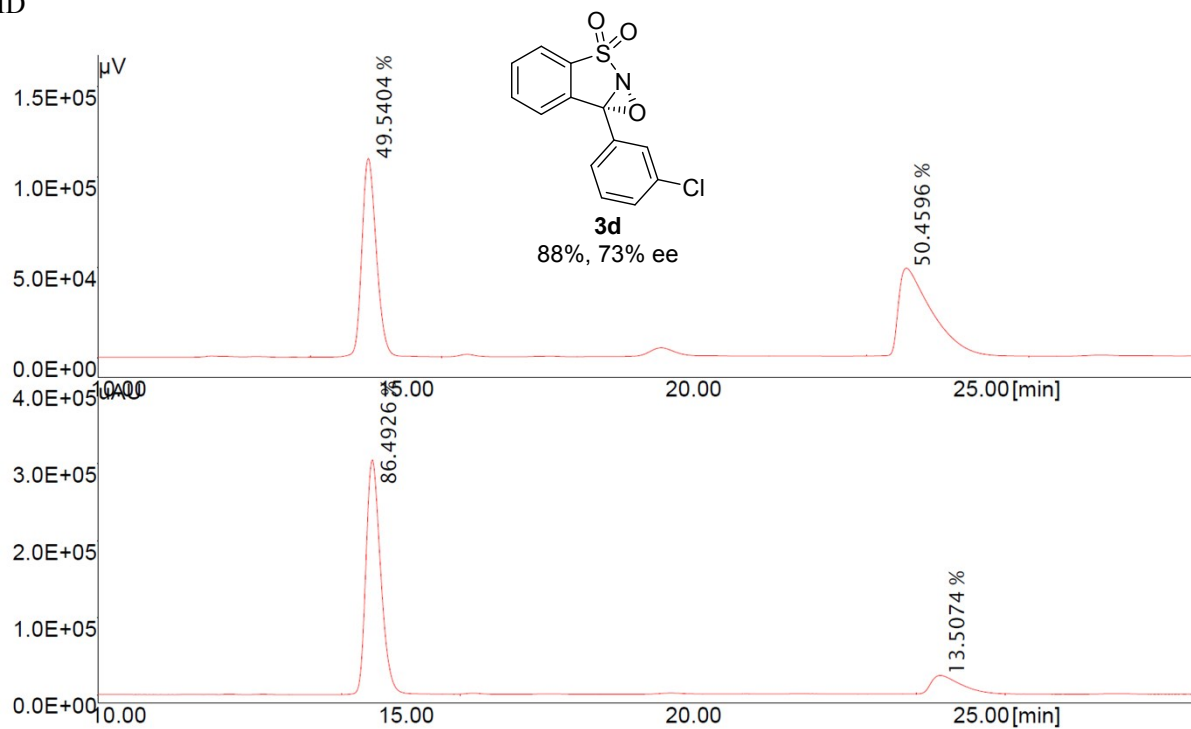

| # | Name | RT     | Area[uAU. Sec] | %Area |
|---|------|--------|----------------|-------|
| 1 |      | 14.533 | 5405261.857    | 86.49 |
| 2 |      | 24.413 | 844128.413     | 13.51 |

ID

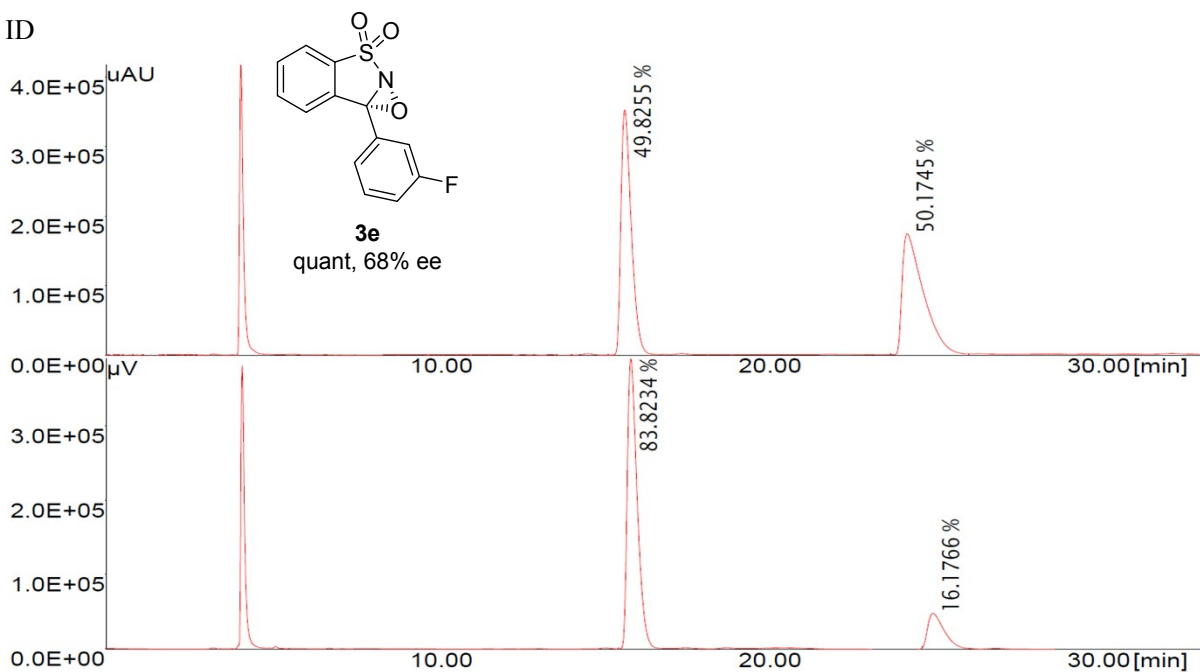

| # | Name | RT     | Area[uAU. Sec] | %Area |
|---|------|--------|----------------|-------|
| 1 |      | 15.787 | 7672917.714    | 49.83 |
| 2 |      | 24.387 | 7726670.975    | 50.17 |

ID

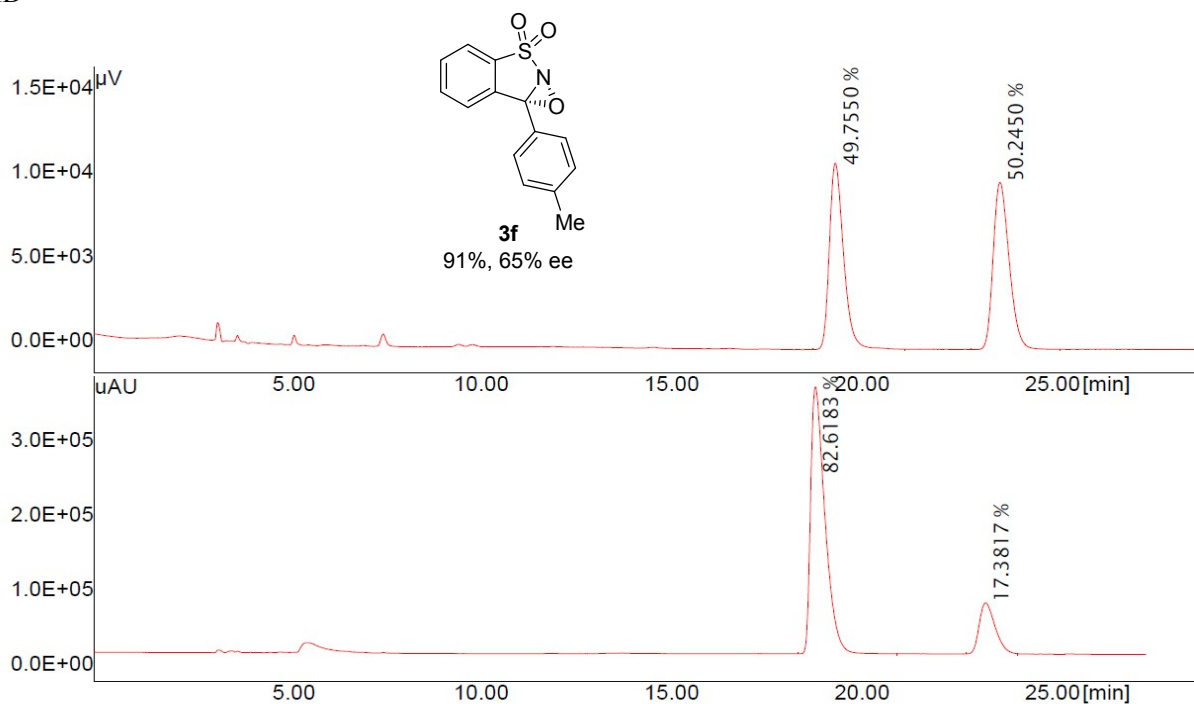

| # | Name | RT     | Area[uAU. Sec] | %Area |
|---|------|--------|----------------|-------|
| 1 |      | 18.933 | 9393228.140    | 82.62 |
| 2 |      | 23.413 | 1976196.829    | 17.38 |

ID

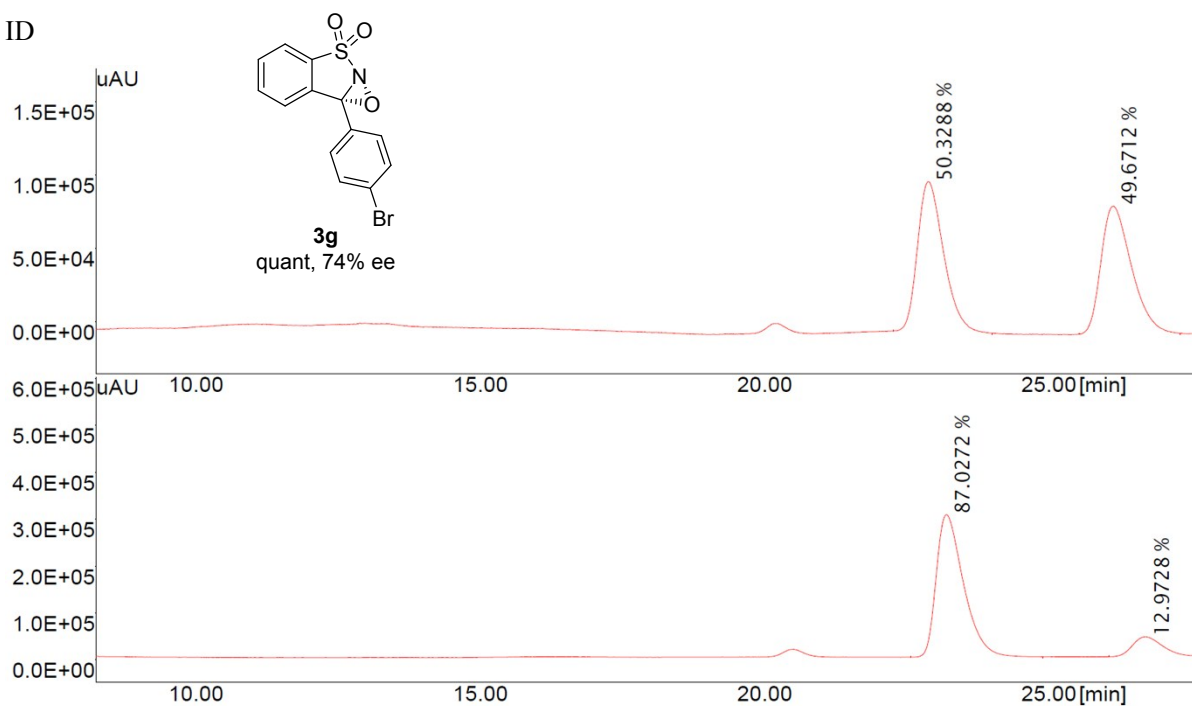

| # | Name | RT     | Area[uAU. Sec] | %Area |
|---|------|--------|----------------|-------|
| 1 |      | 23.307 | 10151432.427   | 87.03 |
| 2 |      | 26.813 | 1513237.623    | 12.97 |

ID

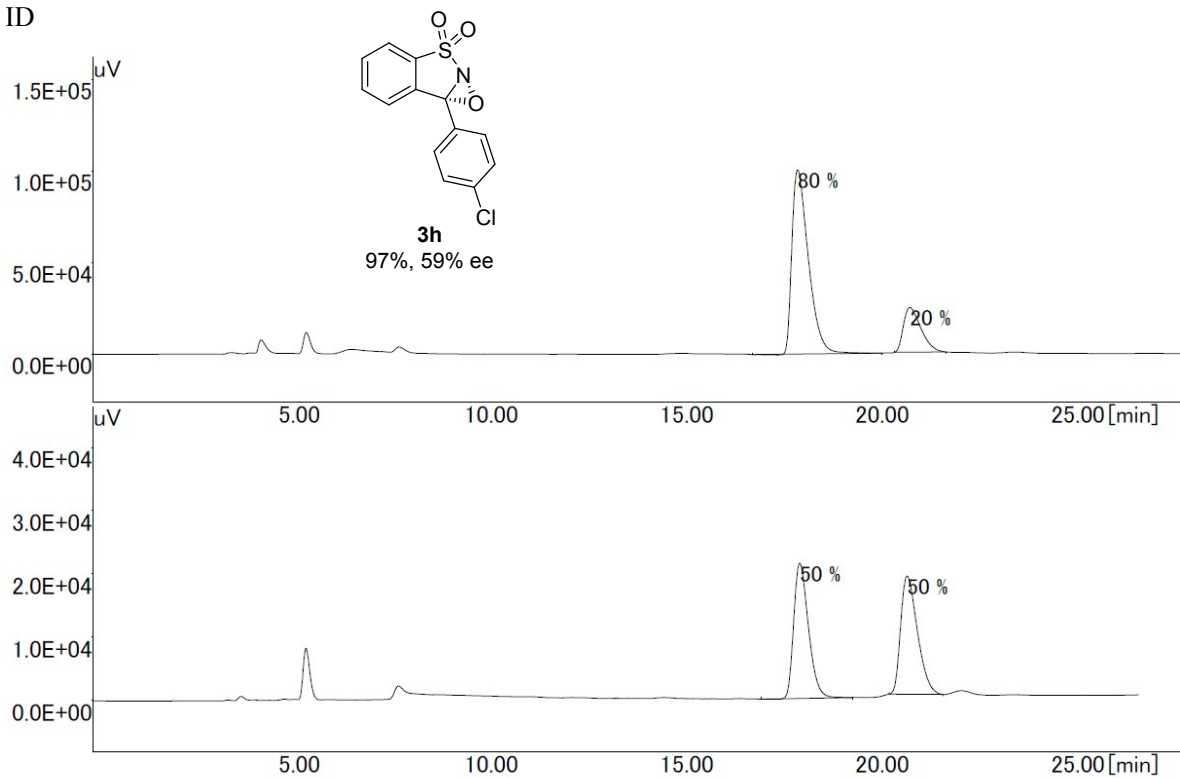

| # | ピーク名 | Rt     | ピーク名 | 面積%   | 定量値   |
|---|------|--------|------|-------|-------|
| 1 |      | 18.017 |      | 79.52 | 0.000 |
| 2 |      | 20.892 |      | 20.48 | 0.000 |

OD-H

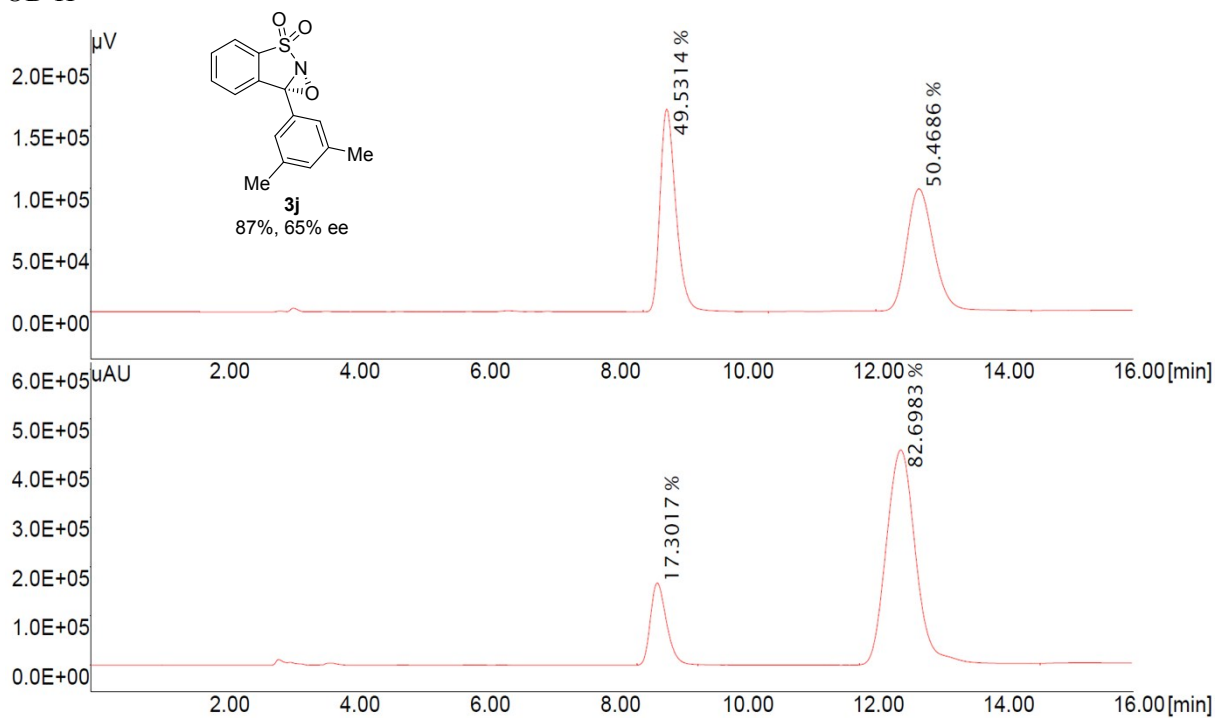

| # | Name | RT     | Area[uAU.Sec] | %Area |
|---|------|--------|---------------|-------|
| 1 |      | 8.707  | 2841583.642   | 17.30 |
| 2 |      | 12.440 | 13582136.602  | 82.70 |

IA

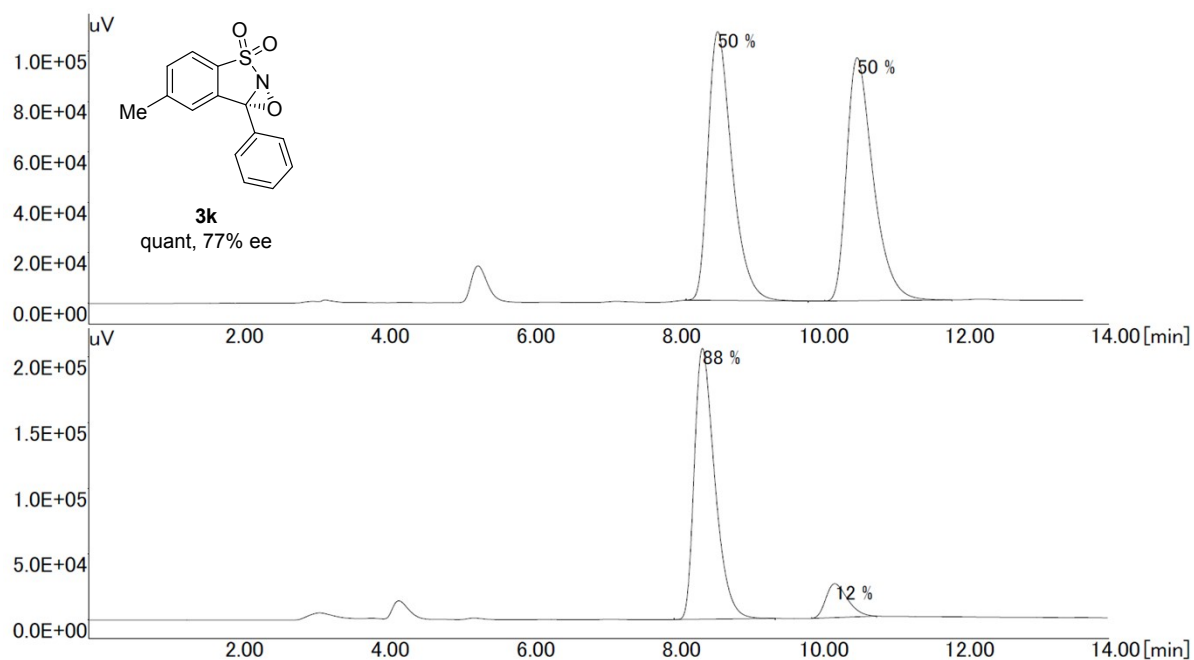

| # | ピーク名 | Rt     | ピーク名 | 面積%   | 定量値   |
|---|------|--------|------|-------|-------|
| 1 |      | 8.433  |      | 88.30 | 0.000 |
| 2 |      | 10.250 |      | 11.70 | 0.000 |

IA

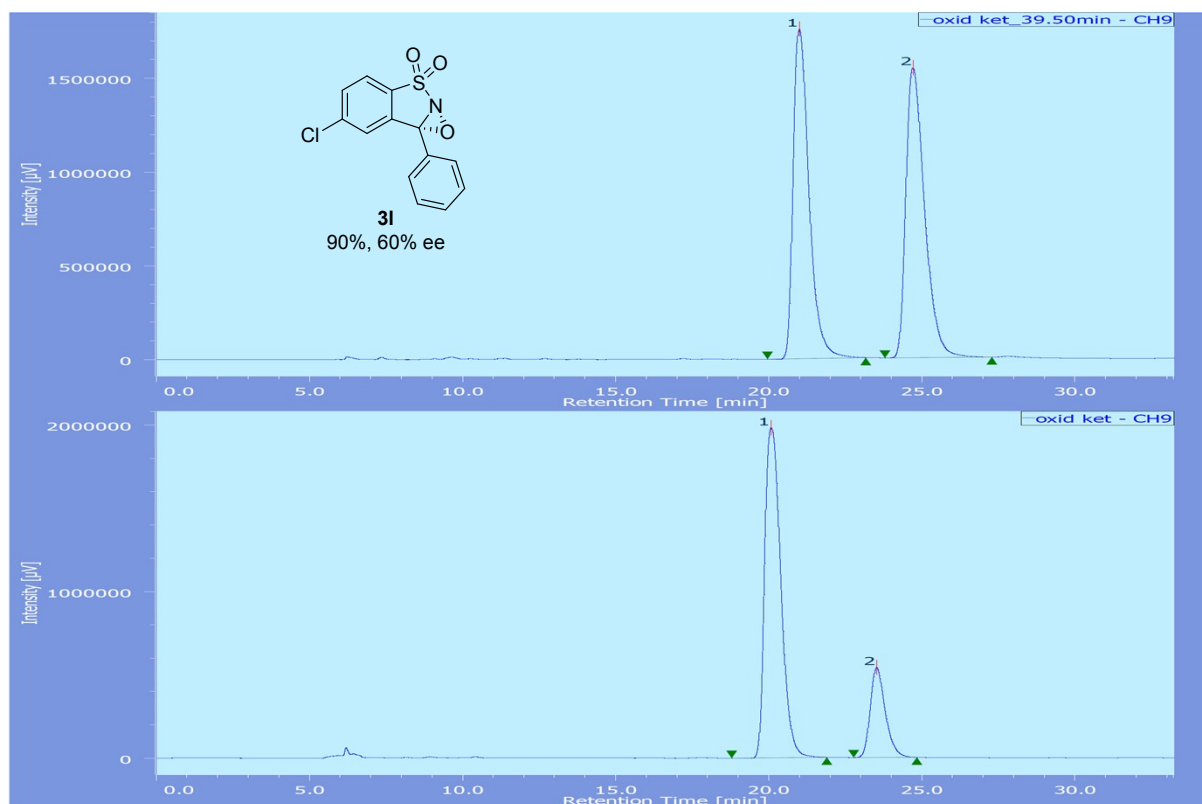

| # | Peak Name | CH | tR [min] | Area [ $\mu\text{V}\cdot\text{sec}$ ] | Height [ $\mu\text{V}$ ] | Area%  | Height% | Quantity | NTP   | Resolution | Symmetry Factor | Warning |
|---|-----------|----|----------|---------------------------------------|--------------------------|--------|---------|----------|-------|------------|-----------------|---------|
| 1 | Unknown   | 9  | 20.060   | 72067019                              | 1979962                  | 79.736 | 78.561  | N/A      | 6970  | 3.771      | 1.424           |         |
| 2 | Unknown   | 9  | 23.502   | 18315041                              | 540320                   | 20.264 | 21.439  | N/A      | 11704 | N/A        | 1.315           |         |

OJ

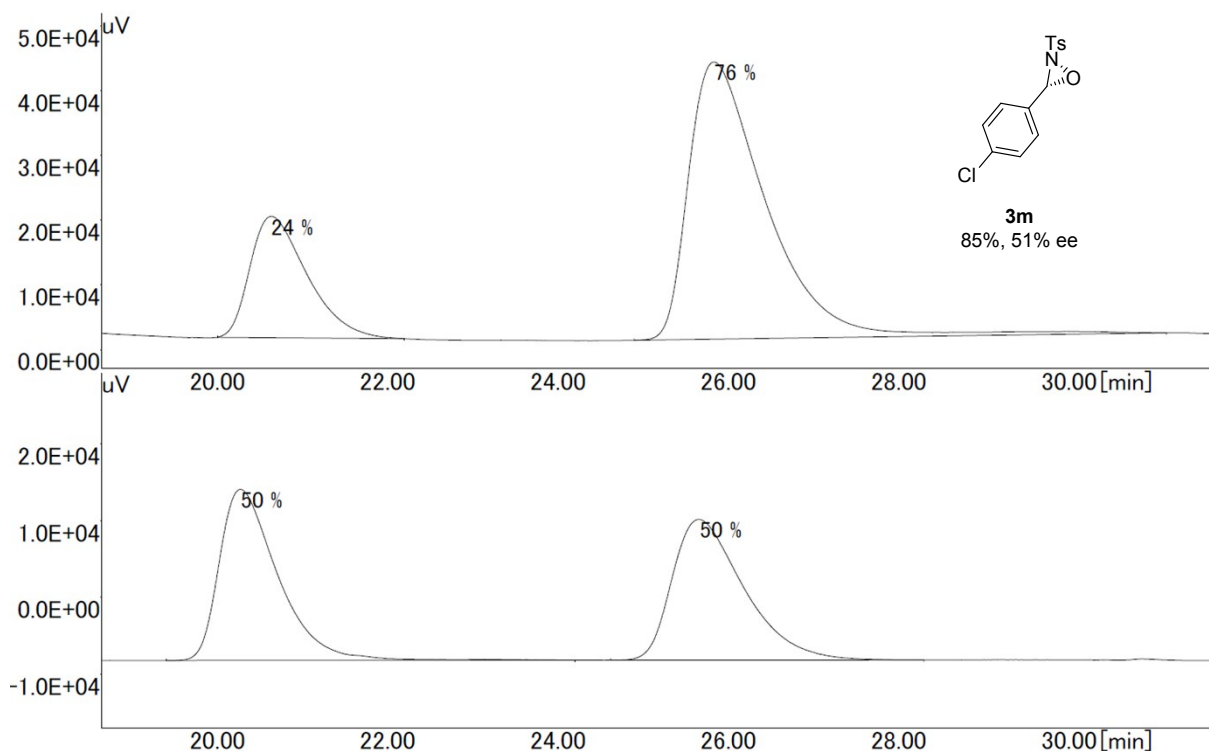

| # | ピーク名 | Rt     | ピーク名  | 面積%   | 定量値 |
|---|------|--------|-------|-------|-----|
| 1 |      | 20.717 | 24.26 | 0.000 |     |
| 2 |      | 25.917 | 75.74 | 0.000 |     |

OD-H

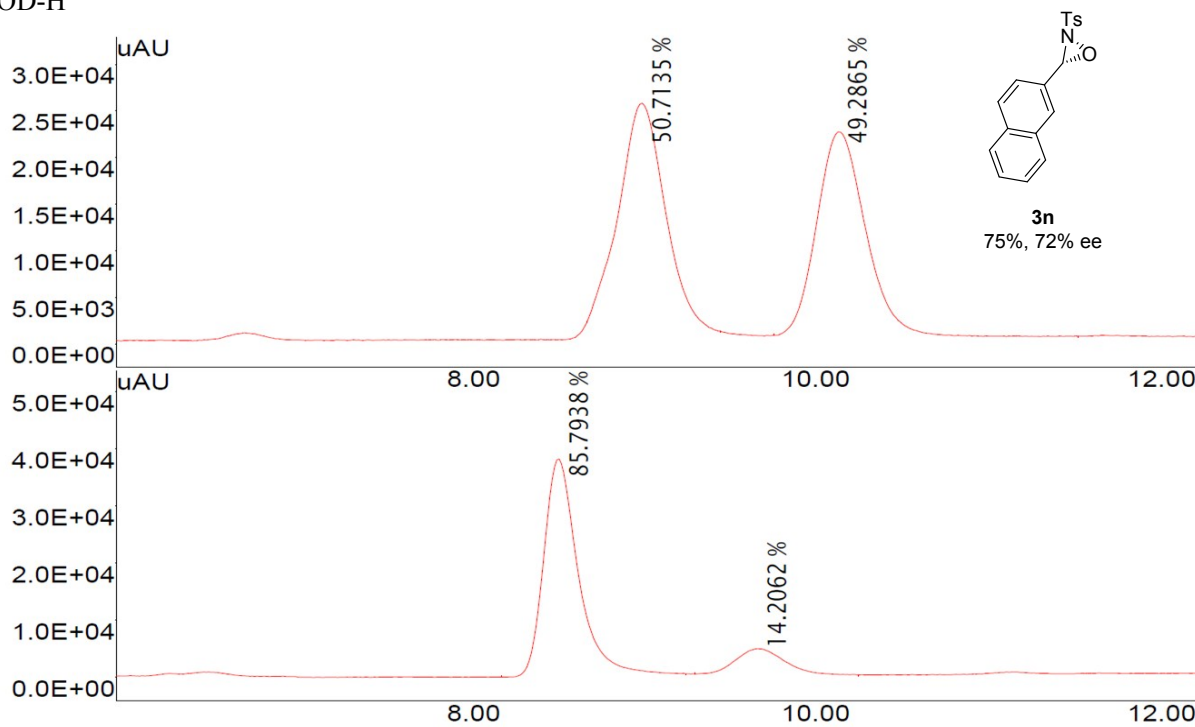

| # | Name | RT    | Area[uAU. Sec] | %Area |
|---|------|-------|----------------|-------|
| 1 |      | 8.560 | 524504.158     | 85.79 |
| 2 |      | 9.707 | 86850.401      | 14.21 |

ID

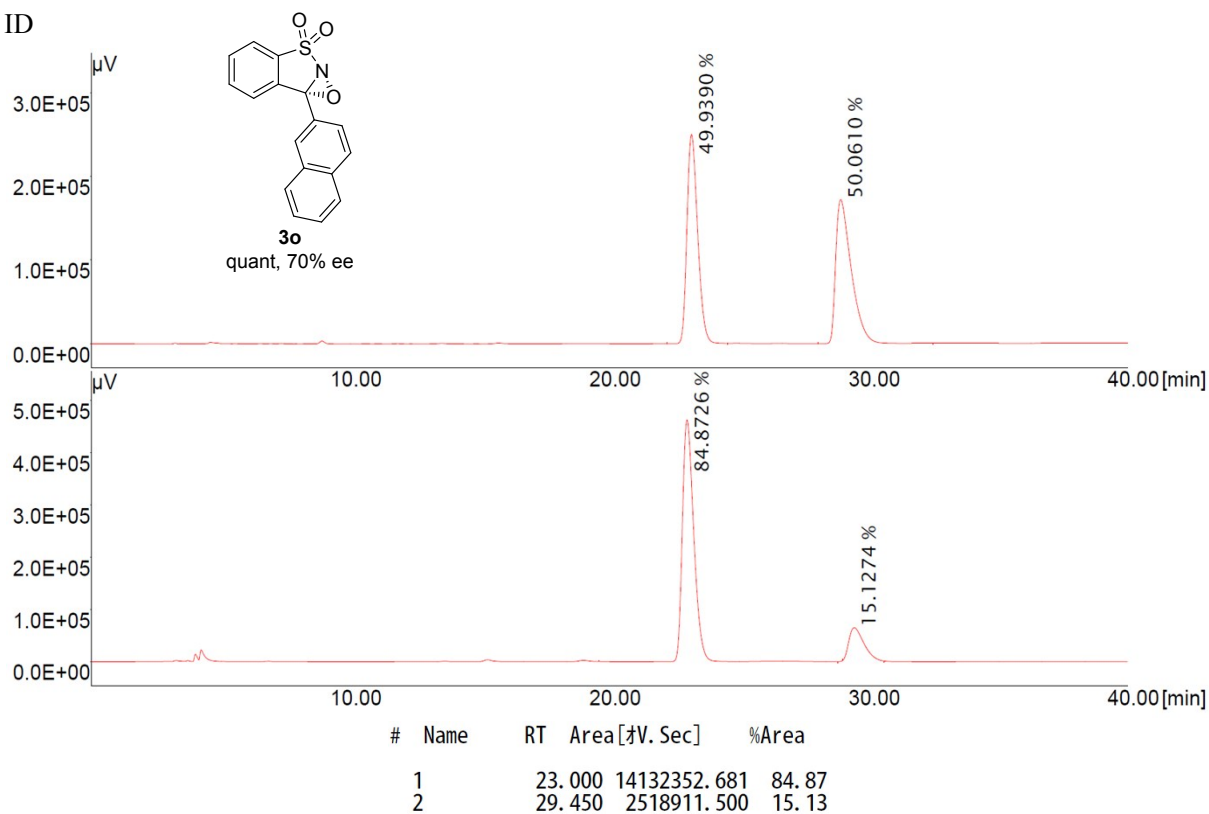

ID

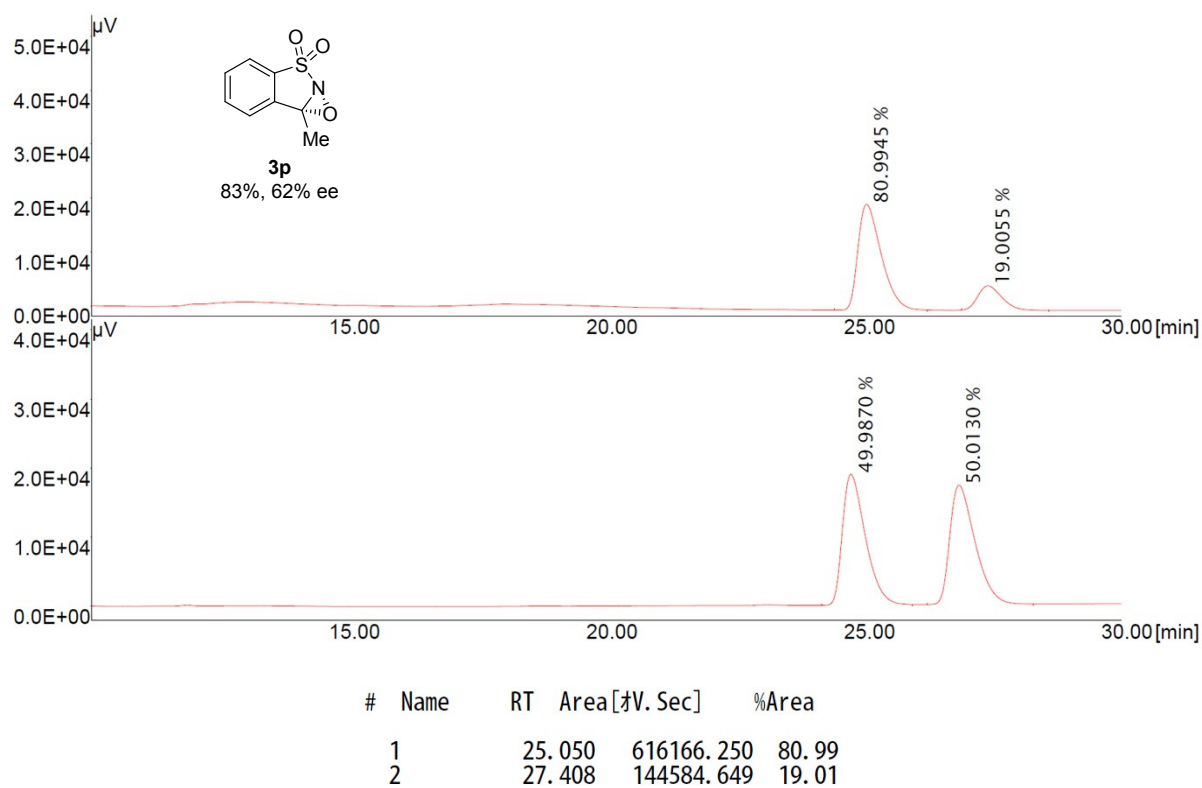

ID

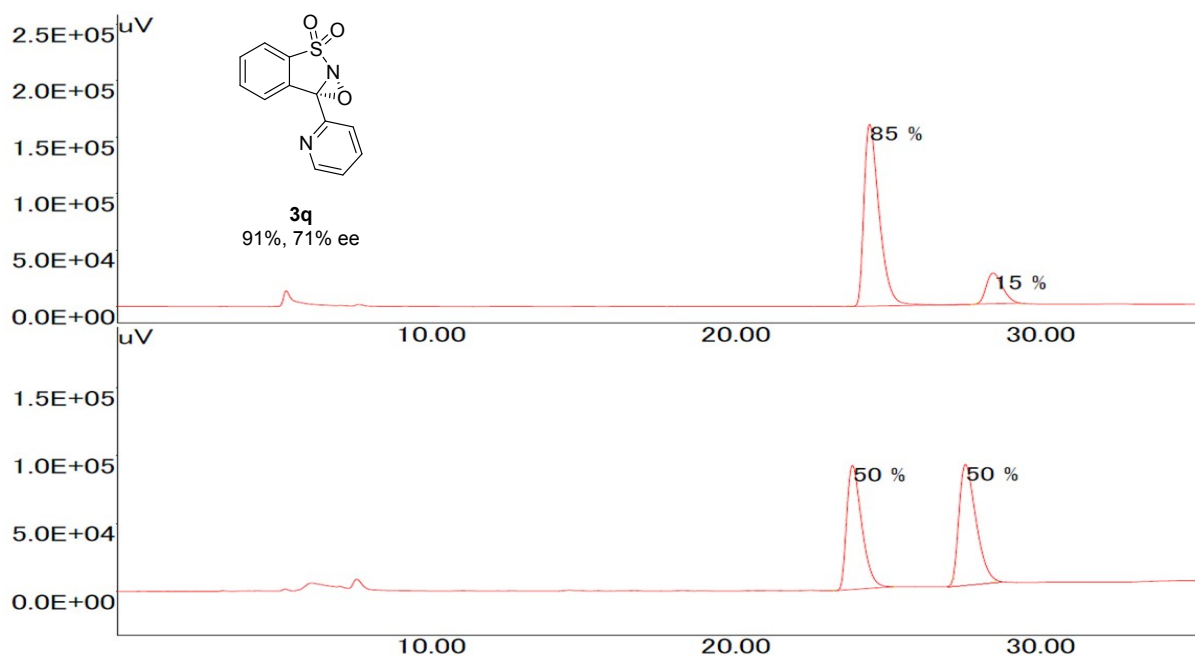

| # | ピーク名 | Rt     | ピーク名 | 面積%   | 定量値   |
|---|------|--------|------|-------|-------|
| 1 |      | 24.692 |      | 84.90 | 0.000 |
| 2 |      | 28.750 |      | 15.10 | 0.000 |
